# Supplementary material for: 1,8-Diazabicyclo[5.4.0]undec-7-ene (DBU)-promoted reduction of azides to amines under metal-free conditions
Source: Royal Society of Chemistry journal article supplement (doi:10.1039/d2nj00341d), 2022-01-01
Supplement: d2nj00341d1.pdf [file d2nj00341d1.pdf]

**1,8-Diazabicyclo[5.4.0]undec-7-ene (DBU)-Promoted Reduction of  
Azides to Amines under Metal-Free Conditions**

Shijie Xu, Fan Yang, Hui Fan, Xuechun Zhao, Yao Xu, Shuo Wang and Xiaoxiang Zhang<sup>\*</sup>

Co-Innovation Center for Efficient Processing and Utilization of Forest Products, College of  
Chemical Engineering, Nanjing Forestry University, Nanjing 210037, China.

## General Considerations

Unless specified, all reactions were carried out in oven-dried glassware with magnetic stirring. All reagents and starting materials were purchased from commercial sources and used as received. Solvents were purified following standard literature procedures. Analytical thin layer chromatography (TLC) was performed using pre-coated silica gel plate. Visualization was achieved by UV light (254 nm). Flash chromatography was performed using silica gel and a gradient solvent system (Ethyl acetate: Petrol ether as eluant).  $^1\text{H}$  and  $^{13}\text{C}$  spectra was measured on 400 MHz spectrometers. HRMS was performed on Waters Xevo G2-XS Tof. Chemical shifts (ppm) were recorded with tetramethylsilane (TMS) as the internal reference standard. Multiplicities are given as: s (singlet), bs (broad singlet), d (doublet), t (triplet), dd (doublet of doublets) or m (multiplet). Organic azides<sup>1-3</sup> were prepared according to the published procedures.

## General experimental procedure for the reduction of azides **1** to amines **2**.

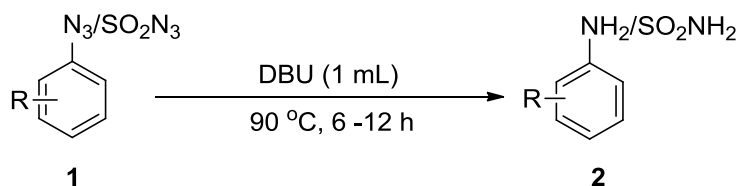

To a 10 mL of flask was added azide **1** (0.1 mmol, 1 equiv) and DBU (1 mL). The reaction mixture was stirred at  $90^\circ\text{C}$ , until the azide disappeared monitored by TLC (about 6 h for most of **1**). Upon cooling to room temperature, water (10 mL) was added, and the mixture was extracted with ethyl acetate (2 x 20 mL). The organic layers were combined, dried over anhydrous  $\text{NaSO}_4$ , and filtered. On completion, the reaction mixture was directly subjected to purification by flash column chromatography on silica gel to give the desired **2**. (eluent: petrol ether: ethyl acetate = 20:1)

## Radical control experiments.

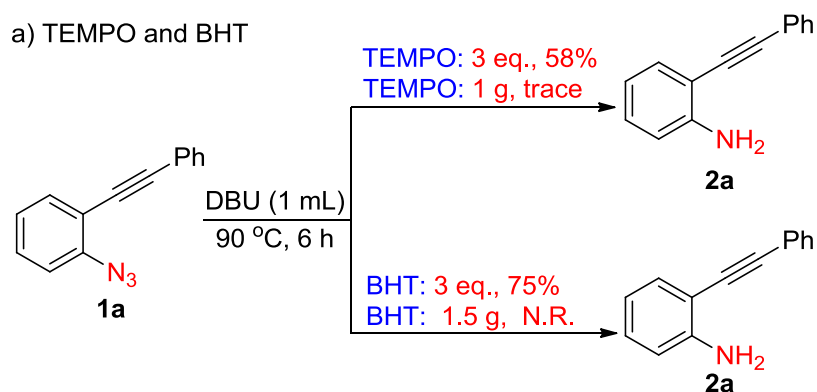

b) HRMS detection in the reaction solution by using 3 eq. of TEMPO

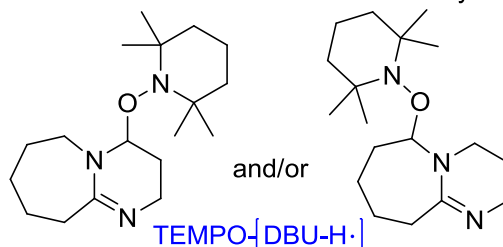

HRMS(ESI) calcl. for  $\text{C}_{18}\text{H}_{34}\text{N}_3\text{O}$   $[\text{M}+\text{H}]^+$  308.2702, found: 308.2698

To a 10 mL of test tube was added 1-azido-2-(phenylethynyl)benzene **1a** (0.1 mmol, 1 equiv.), 2,2,6,6-tetramethylpiperidinoxy (TEMPO) (3eq. or 1 g) and DBU (1 mL). Next, the reaction mixture was stirred at  $90^\circ\text{C}$  for 6 h. After cooling to room

temperature, it was found that a trace amount of reduced 2-(phenylethynyl)aniline **2a** was detected and most of the starting material **1a** was left. Furthermore, to a 10 mL of test tube was added 1-azido-2-(phenylethynyl)benzene **1a** (0.1 mmol, 1 equiv.), butylated hydroxytoluene (BHT) (3eq. or 1.5 g) and DBU (1 mL). Next, the reaction mixture was stirred at 90 °C for 6 h. After cooling to room temperature, it was found that no 2-(phenylethynyl)aniline **2a** was detected and most of the starting material **1a** was left.

We repeated the reaction by employing 3 equiv. of TEMPO to trap the radical [DBU-H<sup>•</sup>]. After 6 hours, the reaction solution was then directly sent to check HRMS and the desired compound TEMPO-[DBU-H<sup>•</sup>] was successfully found (HRMS(ESI) calcd. for C<sub>18</sub>H<sub>34</sub>N<sub>3</sub>O [M+H]<sup>+</sup> 308.2702, found: 308.2698 ). We have added this trapping experiment in the revised manuscript. Please check the HRMS detail below:

#### Single Mass Analysis

Tolerance = 20.0 PPM / DBE: min = -1.5, max = 50.0

Element prediction: Off

Number of isotope peaks used for i-FIT = 3

Monoisotopic Mass, Even Electron Ions

52 formula(e) evaluated with 1 results within limits (up to 50 best isotopic matches for each mass)

Elements Used:

C: 18-18 H: 34-34 N: 0-6 O: 0-10

A

0326-3-HRMS 335 (1.870)

1: TOF MS ES+  
1.68e+004

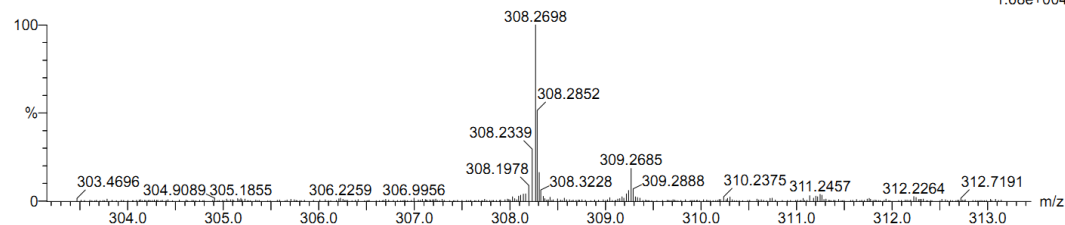

Minimum: -1.5  
Maximum: 50.0

| Mass     | Calc. Mass | mDa  | PPM  | DBE | i-FIT | Norm | Conf (%) | Formula      |
|----------|------------|------|------|-----|-------|------|----------|--------------|
| 308.2698 | 308.2702   | -0.4 | -1.3 | 3.5 | 865.9 | n/a  | n/a      | C18 H34 N3 O |

### 2-Phenylethynylaniline (2a):

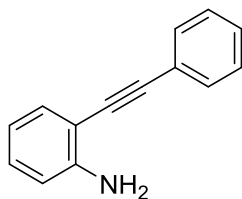

Known compound<sup>4</sup>; isolated yield = 90%; yellow solid; <sup>1</sup>H NMR(CDCl<sub>3</sub>, 400 MHz):  $\delta$  = 4.19 (s, 2 H), 6.51-6.55 (m, 2 H), 7.03-7.07 (m, 1 H), 7.25-7.29 (m, 4 H), 7.43-7.44 (m, 2 H). <sup>13</sup>C NMR (CDCl<sub>3</sub>, 100 MHz)  $\delta$  = 147.8, 132.2, 131.5, 129.8, 128.4, 128.3, 123.4, 118.0, 114.4, 108.0, 94.7, 85.9.

### 5-Methyl-2-(phenylethynyl)aniline (2b):

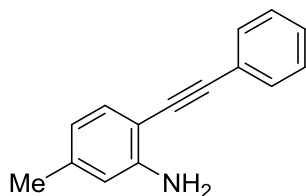

Known compound<sup>4</sup>; isolated yield = 81%; yellow solid; <sup>1</sup>H NMR(CDCl<sub>3</sub>, 400 MHz):  $\delta$  = 2.26 (s, 3 H), 4.20 (s, 2 H), 6.53-6.55 (m, 2 H), 7.24 (s, 1 H), 7.31-7.33 (m, 3 H), 7.49-7.51 (m, 2 H). <sup>13</sup>C NMR (CDCl<sub>3</sub>, 100 MHz)  $\delta$  = 147.7, 140.1, 132.0, 131.4, 128.4, 128.0, 123.6, 119.2, 115.0, 105.2, 94.1, 86.2, 21.7.

### 4-Methyl-2-(phenylethynyl)aniline (2c):

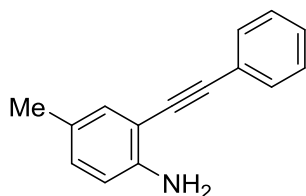

Known compound<sup>5</sup>; isolated yield = 90%; yellow solid; <sup>1</sup>H NMR(CDCl<sub>3</sub>, 400 MHz):  $\delta$  = 2.25 (s, 3 H), 4.15 (s, 2 H), 6.65-6.66 (d,  $J$  = 5.2 Hz, 1 H), 6.96-6.97 (d,  $J$  = 4.8 Hz, 1 H), 7.21 (s, 1 H), 7.35-7.36 (d,  $J$  = 4.8 Hz, 3 H), 7.52-7.53 (d,  $J$  = 4 Hz, 2 H). <sup>13</sup>C NMR (CDCl<sub>3</sub>, 100 MHz)  $\delta$  = 145.5, 132.3, 131.5, 130.6, 128.4, 128.2, 127.3, 123.5, 114.6, 108.0, 94.5, 86.2, 20.3.

**5-Fluoro-2-(phenylethynyl)aniline (2d):**

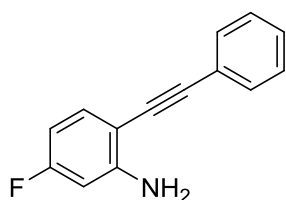

Known compound<sup>6</sup>; isolated yield = 83%; yellow solid; <sup>1</sup>H NMR(CDCl<sub>3</sub>, 400 MHz):  $\delta$  = 4.39 (s, 2 H), 6.41-6.43 (d,  $J$  = 9.2 Hz, 2 H), 6.96-6.97 (d,  $J$  = 4.8 Hz, 1 H), 7.30-7.35 (m, 4 H), 7.50-7.52 (m, 2 H). <sup>13</sup>C NMR (CDCl<sub>3</sub>, 100 MHz)  $\delta$  = 163.8 (d,  $J$  = 245.5 Hz), 149.5 (d,  $J$  = 11.6 Hz), 133.7 (d,  $J$  = 10.4 Hz), 131.5, 128.4, 128.3, 123.2, 105.3 (d,  $J$  = 22.4 Hz), 104.1, 101.7 (d,  $J$  = 25.4 Hz), 94.3 (d,  $J$  = 1.4 Hz), 85.0.

**5-Chloro-2-(phenylethynyl)aniline (2e):**

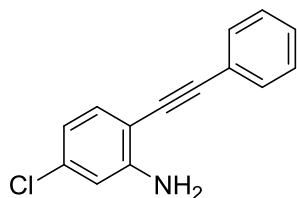

Known compound<sup>7</sup>; isolated yield = 90%; yellow solid; <sup>1</sup>H NMR(CDCl<sub>3</sub>, 400 MHz):  $\delta$  = 4.33 (s, 2 H), 6.67-6.71 (m, 2 H), 7.28 (s, 1 H), 7.34-7.35 (m, 3 H), 7.50-7.52 (m, 2 H). <sup>13</sup>C NMR (CDCl<sub>3</sub>, 100 MHz)  $\delta$  = 148.7, 135.3, 133.1, 131.5, 128.5, 123.0, 118.2, 114.1, 106.5, 95.4, 84.9.

**2-(Phenylethynyl)-4-(trifluoromethyl)aniline (2f):**

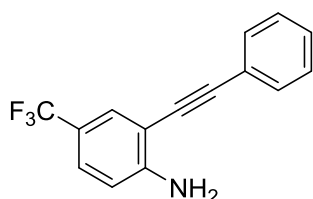

Known compound<sup>6</sup>; isolated yield = 52%; yellow solid; <sup>1</sup>H NMR(CDCl<sub>3</sub>, 400 MHz):  $\delta$  = 4.59 (s, 2 H), 6.74-6.75 (d,  $J$  = 5.6 Hz, 1 H), 7.35-7.37 (m, 4 H), 7.53-7.54 (m, 2 H), 7.63 (s, 1 H). <sup>13</sup>C NMR (CDCl<sub>3</sub>, 100 MHz)  $\delta$  = 150.3, 131.7, 129.7 (d,  $J$  = 2.9 Hz), 128.7, 128.5, 126.7 (d,  $J$  = 2.2 Hz), 124.4, 122.7, 120.0 (d,  $J$  = 10.9 Hz), 113.7, 107.7, 95.8, 84.5.

**Methyl 4-amino-3-(phenylethynyl)benzoate (2g):**

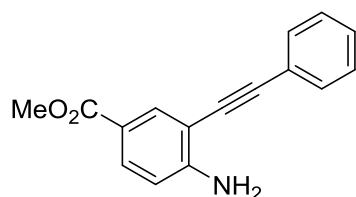

Known compound<sup>8</sup>; isolated yield = 90%; brown solid; <sup>1</sup>H NMR(CDCl<sub>3</sub>, 400 MHz):  $\delta$  = 3.86 (s, 2 H), 4.71 (s, 2 H), 6.69-6.71 (d,  $J$  = 8.4 Hz, 1 H), 7.35-7.36 (m, 3 H), 7.51-7.53 (m, 2 H), 7.80-7.82 (d,  $J$  = 8.4 Hz, 1 H), 8.09 (s, 1 H). <sup>13</sup>C NMR (CDCl<sub>3</sub>, 100 MHz)  $\delta$  = 166.7, 151.5, 134.5, 131.5, 131.5, 128.5, 128.5, 122.9, 119.5, 113.3, 107.2, 95.1, 84.8, 51.8.

**2-((4-Ethylphenyl)ethynyl)aniline (2h):**

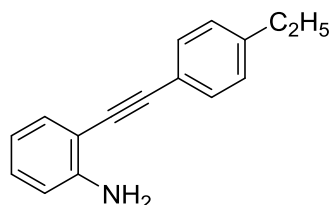

Known compound<sup>9</sup>; isolated yield = 81%; brown solid; <sup>1</sup>H NMR(CDCl<sub>3</sub>, 400 MHz):  $\delta$  = 1.30 (s, 3 H), 2.69-2.71 (d,  $J$  = 7.6 Hz, 2 H), 4.31 (s, 2 H), 6.75-6.77 (d,  $J$  = 7.6 Hz, 2 H), 7.15-7.19 (m, 1 H), 7.21-7.23 (d,  $J$  = 8.0 Hz, 2 H), 7.39-7.41 (d,  $J$  = 7.6 Hz, 1 H), 7.48-7.50 (d,  $J$  = 7.6 Hz, 2 H). <sup>13</sup>C NMR (CDCl<sub>3</sub>, 100 MHz)  $\delta$  = 147.8, 144.7, 132.1, 131.5, 129.6, 128.0, 120.5, 118.0, 114.3, 108.2, 94.9, 85.2, 28.9, 15.4.

**2-((4-Pentylphenyl)ethynyl)aniline (2i):**

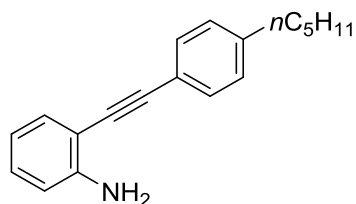

Known compound<sup>10</sup>; isolated yield = 88%; brown liquid; <sup>1</sup>H NMR(CDCl<sub>3</sub>, 400 MHz):  $\delta$  = 0.92 (m, 3 H), 1.35-1.37 (m, 4 H), 1.64-1.65 (m, 2 H), 2.63-2.64 (m, 2 H), 4.26 (s, 2 H), 6.72-6.74 (m, 2 H), 7.14-7.18 (m, 3 H), 7.37-7.38 (m, 1 H), 7.45-7.46 (m, 2 H).

$^{13}\text{C}$  NMR ( $\text{CDCl}_3$ , 100 MHz)  $\delta$  =147.8, 143.5, 132.1, 131.4, 129.6, 128.6, 120.5, 118.0, 114.4, 108.3, 95.0, 85.2, 35.9, 31.5, 31.0, 22.6, 14.1.

**2-((4-Chlorophenyl)ethynyl)aniline (2j):**

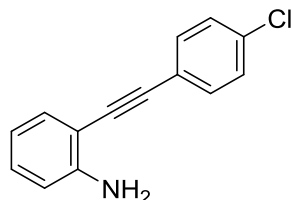

Known compound<sup>5</sup>; isolated yield = 83%; yellow solid;  $^1\text{H}$  NMR( $\text{CDCl}_3$ , 400 MHz):  $\delta$  =4.26 (s, 2 H), 6.72-6.73 (m, 2 H), 7.14-7.17 (m, 1 H), 7.32-7.36 (dd,  $J$ =5.6 Hz,  $J$ =5.2 Hz, 3 H), 7.44-7.45 (d,  $J$ = 5.6 Hz, 2 H).  $^{13}\text{C}$  NMR ( $\text{CDCl}_3$ , 100 MHz)  $\delta$  =147.8, 134.2, 132.7, 132.2, 130.0, 128.8, 121.9, 118.1, 114.5, 107.6, 93.6, 87.0.

**2-(Thiophen-2-ylethynyl)aniline (2k):**

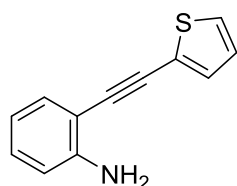

Known compound<sup>5</sup>; isolated yield = 74%; yellow solid;  $^1\text{H}$  NMR( $\text{CDCl}_3$ , 400 MHz):  $\delta$  =4.26 (s, 2 H), 6.72-6.73 (m, 2 H), 7.13-7.15 (m, 1 H), 7.20-7.21 (m, 1 H), 7.30-7.31 (m, 1 H), 7.35-7.46 (d,  $J$ = 4.8 Hz, 1 H), 7.51 (s, 1 H).  $^{13}\text{C}$  NMR ( $\text{CDCl}_3$ , 100 MHz)  $\delta$  =147.8, 132.2, 129.9, 129.7, 128.4, 125.5, 122.3, 118.0, 114.4, 107.9, 89.7, 85.4.

**2-(Cyclopropylethynyl)aniline (2l):**

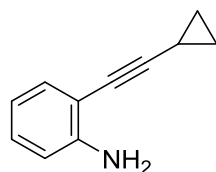

Known compound<sup>11</sup>; isolated yield = 78%; black liquid;  $^1\text{H}$  NMR( $\text{CDCl}_3$ , 400 MHz):  $\delta$  =0.78-0.83 (m, 2 H), 0.86-0.91 (m, 2 H), 1.46-1.53 (m, 1 H), 4.13 (s, 2 H), 6.62-6.67 (m, 2 H), 7.04-7.08 (m, 1 H), 7.20-7.23 (m, 1 H).  $^{13}\text{C}$  NMR ( $\text{CDCl}_3$ , 100 MHz)  $\delta$  =147.9, 132.2, 128.9, 117.9, 114.2, 108.8, 98.8, 77.4, 77.0, 76.7, 72.1, 8.9, 0.4.



**2-(3,3-Dimethyl-1-butynyl)aniline (2m):**

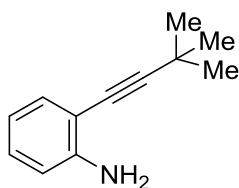

Known compound<sup>11</sup>; isolated yield = 75%; black liquid; <sup>1</sup>H NMR(CDCl<sub>3</sub>, 400 MHz):  $\delta$  = 1.34 (s, 9 H), 4.13 (s, 2 H), 6.63-6.68 (m, 2 H), 7.04-7.08 (t,  $J$  = 7.6 Hz, 1 H), 7.21-7.23 (d,  $J$  = 7.6 Hz, 1 H). <sup>13</sup>C NMR (CDCl<sub>3</sub>, 100 MHz)  $\delta$  = 147.4, 131.9, 128.8, 117.9, 114.1, 108.9, 104.2, 75.4, 31.3, 28.3.

**2-(2-(Hydroxymethyl)ethynyl)aniline (2n):**

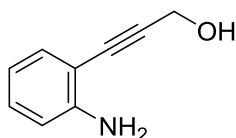

Known compound<sup>12</sup>; isolated yield = 49%; black liquid; <sup>1</sup>H NMR(CDCl<sub>3</sub>, 400 MHz):  $\delta$  = 1.70 (m, 1 H), 4.25 (s, 2 H), 4.53 (s, 2 H), 6.65-6.69 (m, 2 H), 7.10-7.14 (m, 1 H), 7.26-7.27 (m, 1 H). <sup>13</sup>C NMR (CDCl<sub>3</sub>, 100 MHz)  $\delta$  = 148.0, 132.4, 130.0, 118.0, 114.4, 107.2, 92.7, 82.4, 51.7.

***p*-Toluidine (2o):**

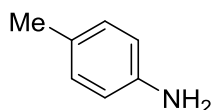

Known compound<sup>13</sup>; isolated yield = 90%; brown solid; <sup>1</sup>H NMR(CDCl<sub>3</sub>, 400 MHz):  $\delta$  = 2.24 (s, 3 H), 3.54 (s, 2 H), 6.62 (s, 2 H), 6.98 (s, 2 H).

**4-(Tert-butyl)aniline (2p):**

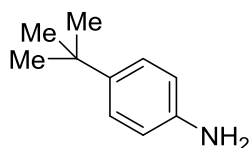

Known compound<sup>14</sup>; isolated yield = 53%; brown liquid; <sup>1</sup>H NMR(CDCl<sub>3</sub>, 400 MHz):  $\delta$  = 1.33 (s, 9 H), 3.57 (s, 2 H), 6.68-6.70 (d, *J* = 7.6 Hz, 2 H), 7.22-7.24 (d, *J* = 7.6 Hz, 2 H).

**4-Methoxy-aniline (2q):**

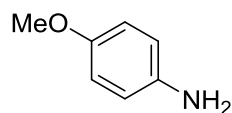

Known compound<sup>13</sup>; isolated yield = 49%; brown solid; <sup>1</sup>H NMR(CDCl<sub>3</sub>, 400 MHz):  $\delta$  = 3.34 (s, 2 H), 3.74 (s, 3 H), 6.63-6.65 (m, 2 H), 6.73-6.76 (m, 2 H).

**2-Iodoaniline (2r):**

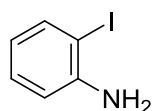

Known compound<sup>15</sup>; isolated yield = 80%; white solid; <sup>1</sup>H NMR(CDCl<sub>3</sub>, 400 MHz):  $\delta$  = 4.11 (s, 2 H), 6.48-6.52 (m, 2 H), 6.62-6.64 (d, *J* = 8.8 Hz, 2 H)

**4-Aminobenzonitrile (2s):**

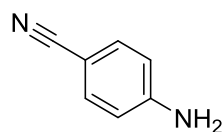

Known compound<sup>13</sup>; isolated yield = 69%; white solid; <sup>1</sup>H NMR(CDCl<sub>3</sub>, 400 MHz):  $\delta$  = 4.20 (s, 2 H), 6.62-6.64 (d, *J* = 8.8 Hz, 2 H), 7.38-7.40 (d, *J* = 8.8 Hz, 2 H).

**4-Bromoaniline (2t):**

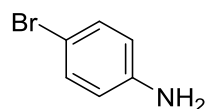

Known compound<sup>13</sup>; isolated yield = 65%; brown solid; <sup>1</sup>H NMR(CDCl<sub>3</sub>, 400 MHz):  $\delta$  = 3.67 (s, 2 H), 6.56-6.58 (d,  $J$  = 7.6 Hz, 2 H), 7.23-7.25 (d,  $J$  = 7.6 Hz, 2 H).

**Naphthalene-1-amine (2u):**

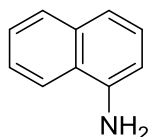

Known compound<sup>13</sup>; isolated yield = 64%; brown liquid; <sup>1</sup>H NMR(CDCl<sub>3</sub>, 400 MHz):  $\delta$  = 4.15 (s, 2 H), 6.78-6.80 (m, 1 H), 7.28-7.35 (m, 2 H), 7.46-7.49 (m, 2 H), 7.81-7.83 (m, 2 H).

**Toluene-4-sulfonamide (2v):**

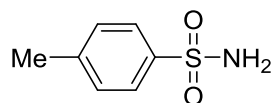

Known compound<sup>16</sup>; isolated yield = 69%; white solid; <sup>1</sup>H NMR(CDCl<sub>3</sub>, 400 MHz):  $\delta$  = 2.42 (s, 2 H), 4.96 (s, 2 H), 7.29-7.31 (d,  $J$  = 8 Hz, 2 H), 7.79-7.81 (d,  $J$  = 8 Hz, 2 H).

**Figure 1.**  $^1\text{H}$  NMR and  $^{13}\text{C}$  NMR Spectra of  
**2-Phenylethynylaniline (2a)**

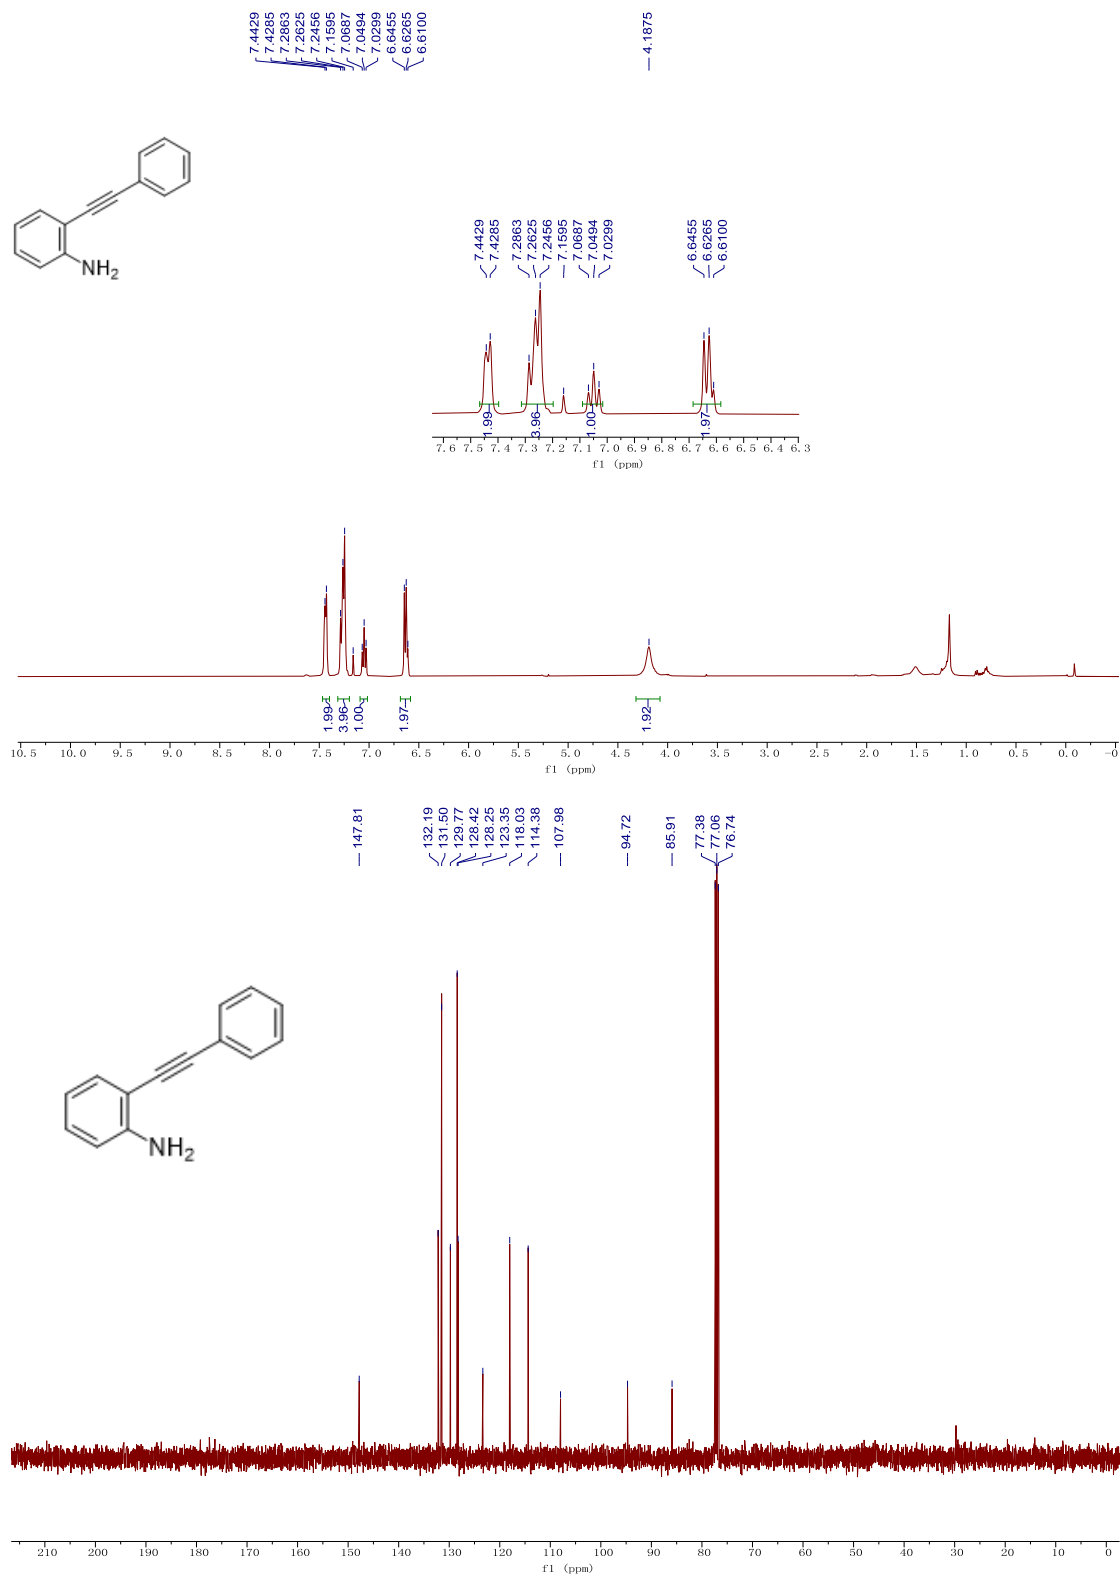

**Figure 2.**  $^1\text{H}$  NMR and  $^{13}\text{C}$  NMR Spectra of  
**5-Methyl-2-(phenylethynyl)aniline (2b)**

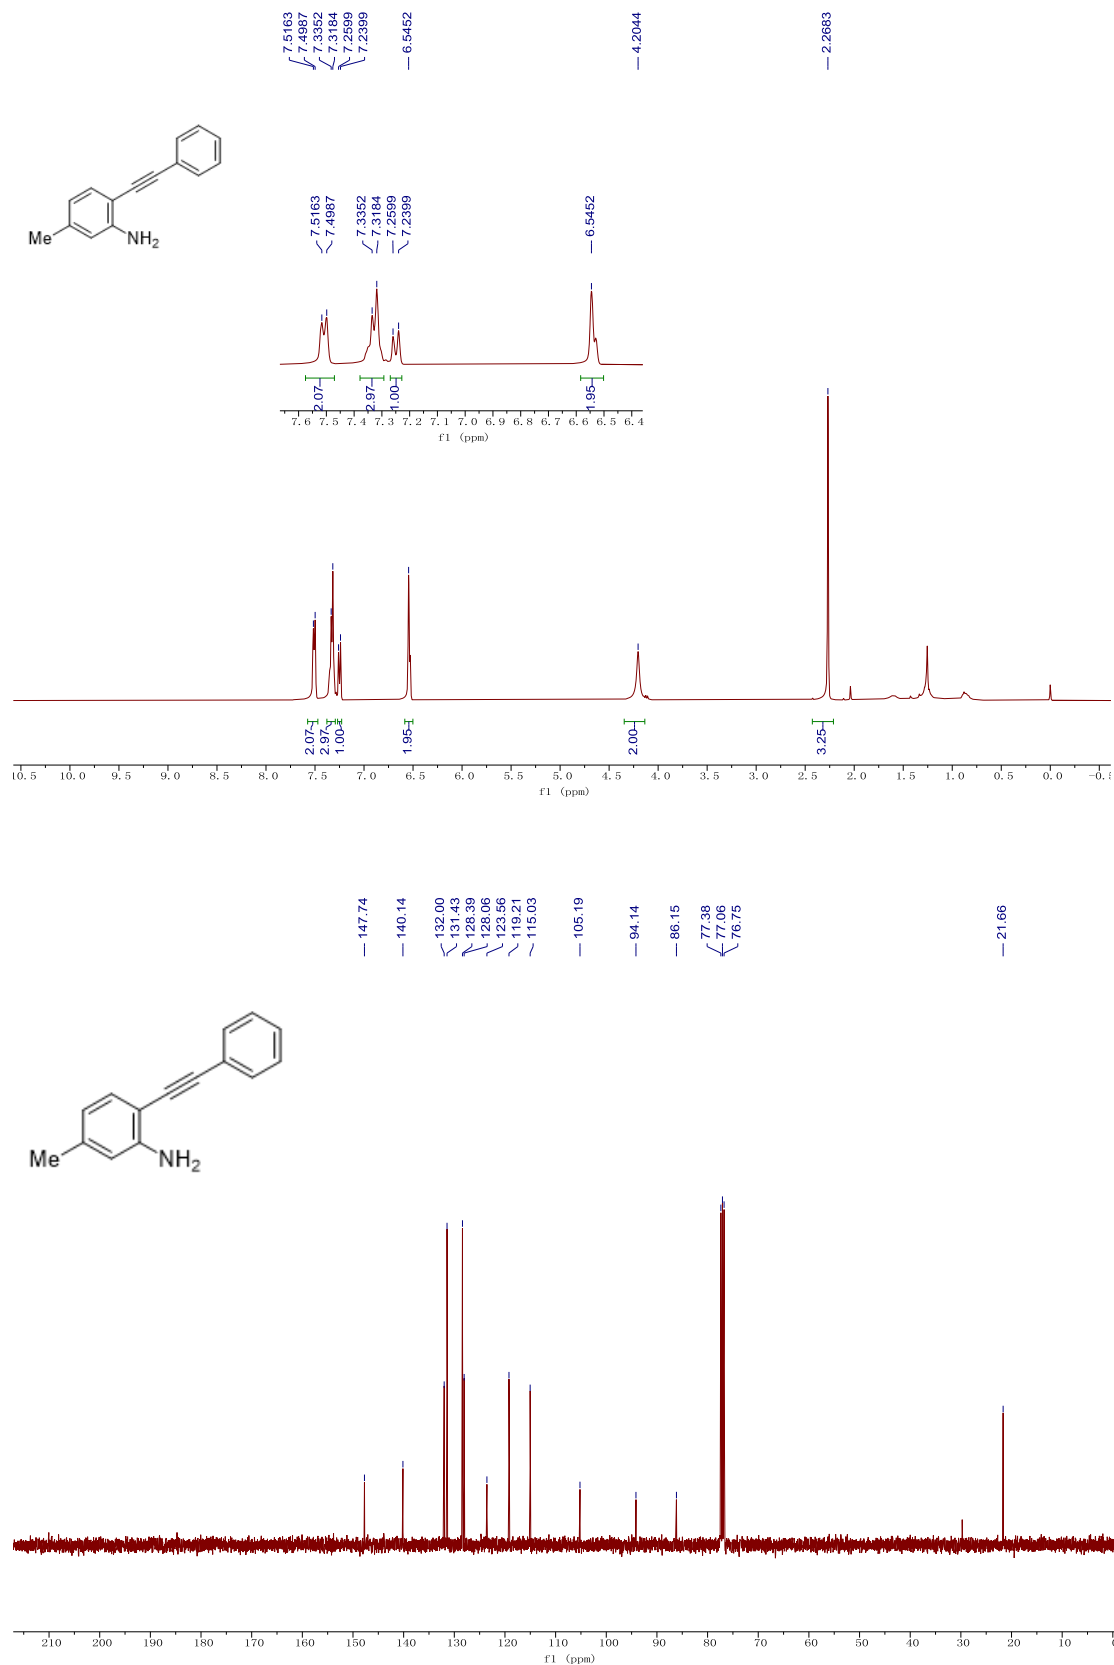

**Figure 3.**  $^1\text{H}$  NMR and  $^{13}\text{C}$  NMR Spectra of  
**4-Methyl-2-(phenylethynyl)aniline (2c)**

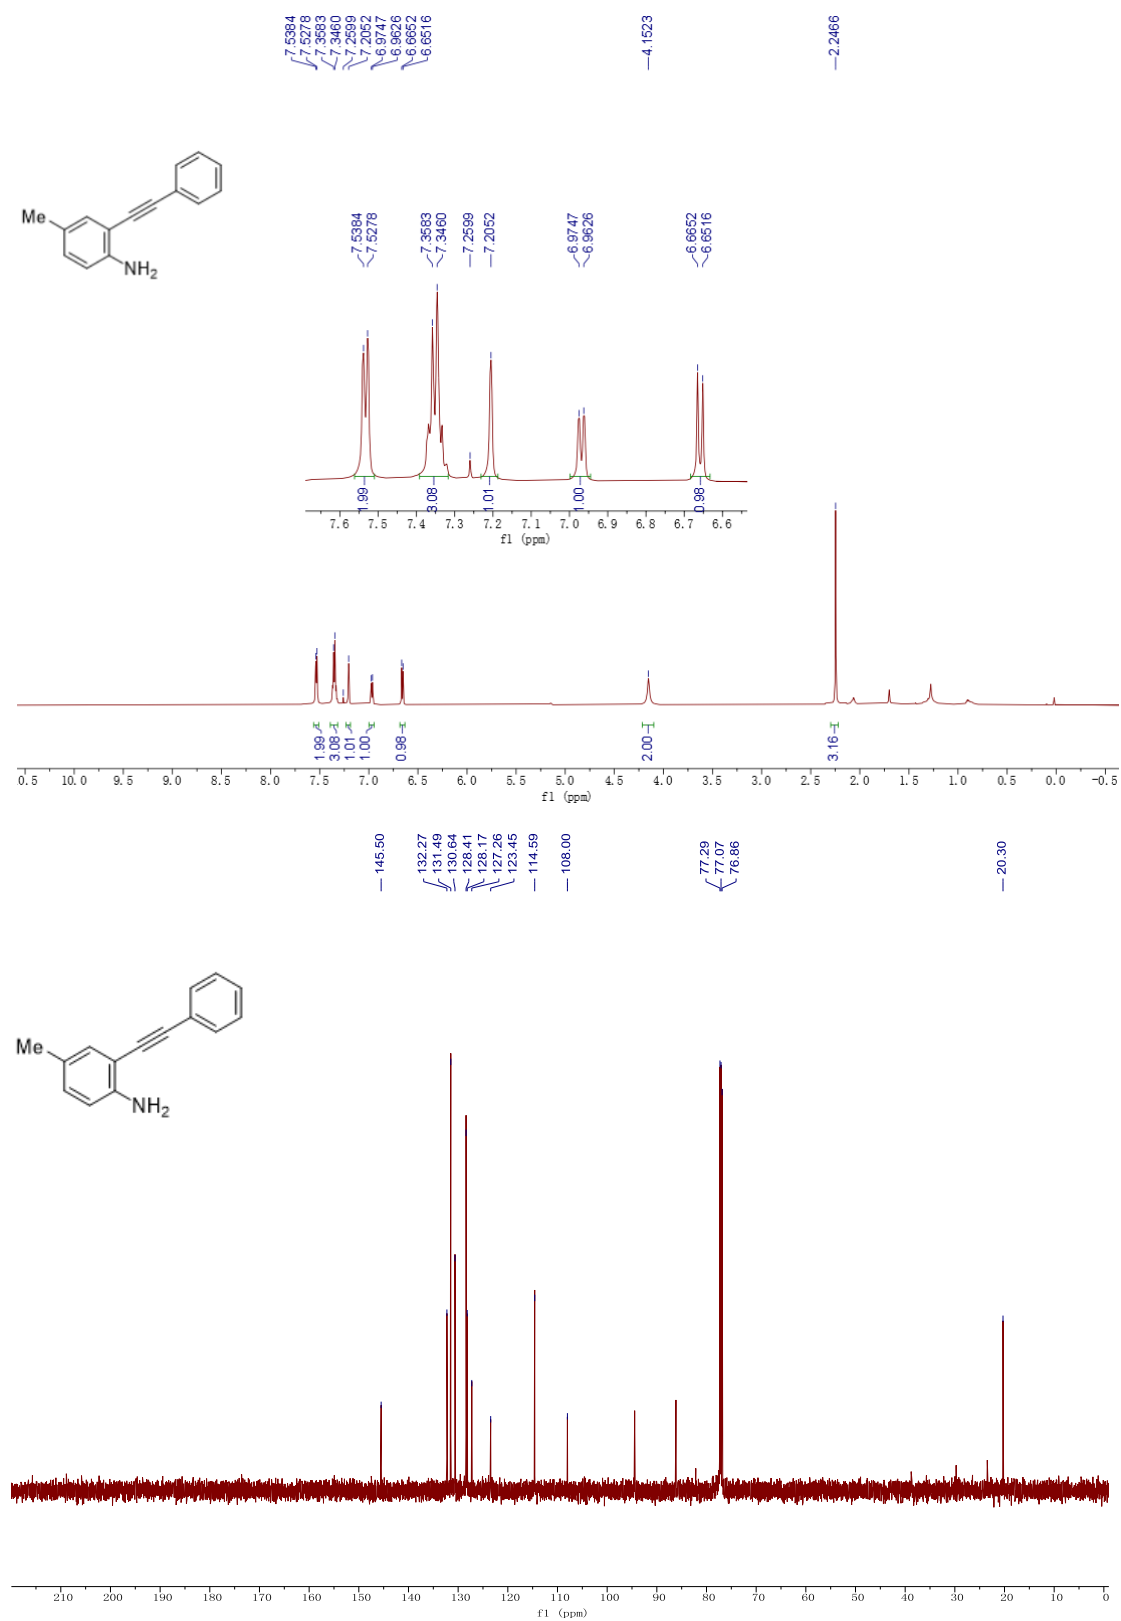

**Figure 4.**  $^1\text{H}$  NMR and  $^{13}\text{C}$  NMR Spectra of  
**5-Fluoro-2-(phenylethynyl)aniline (2d)**

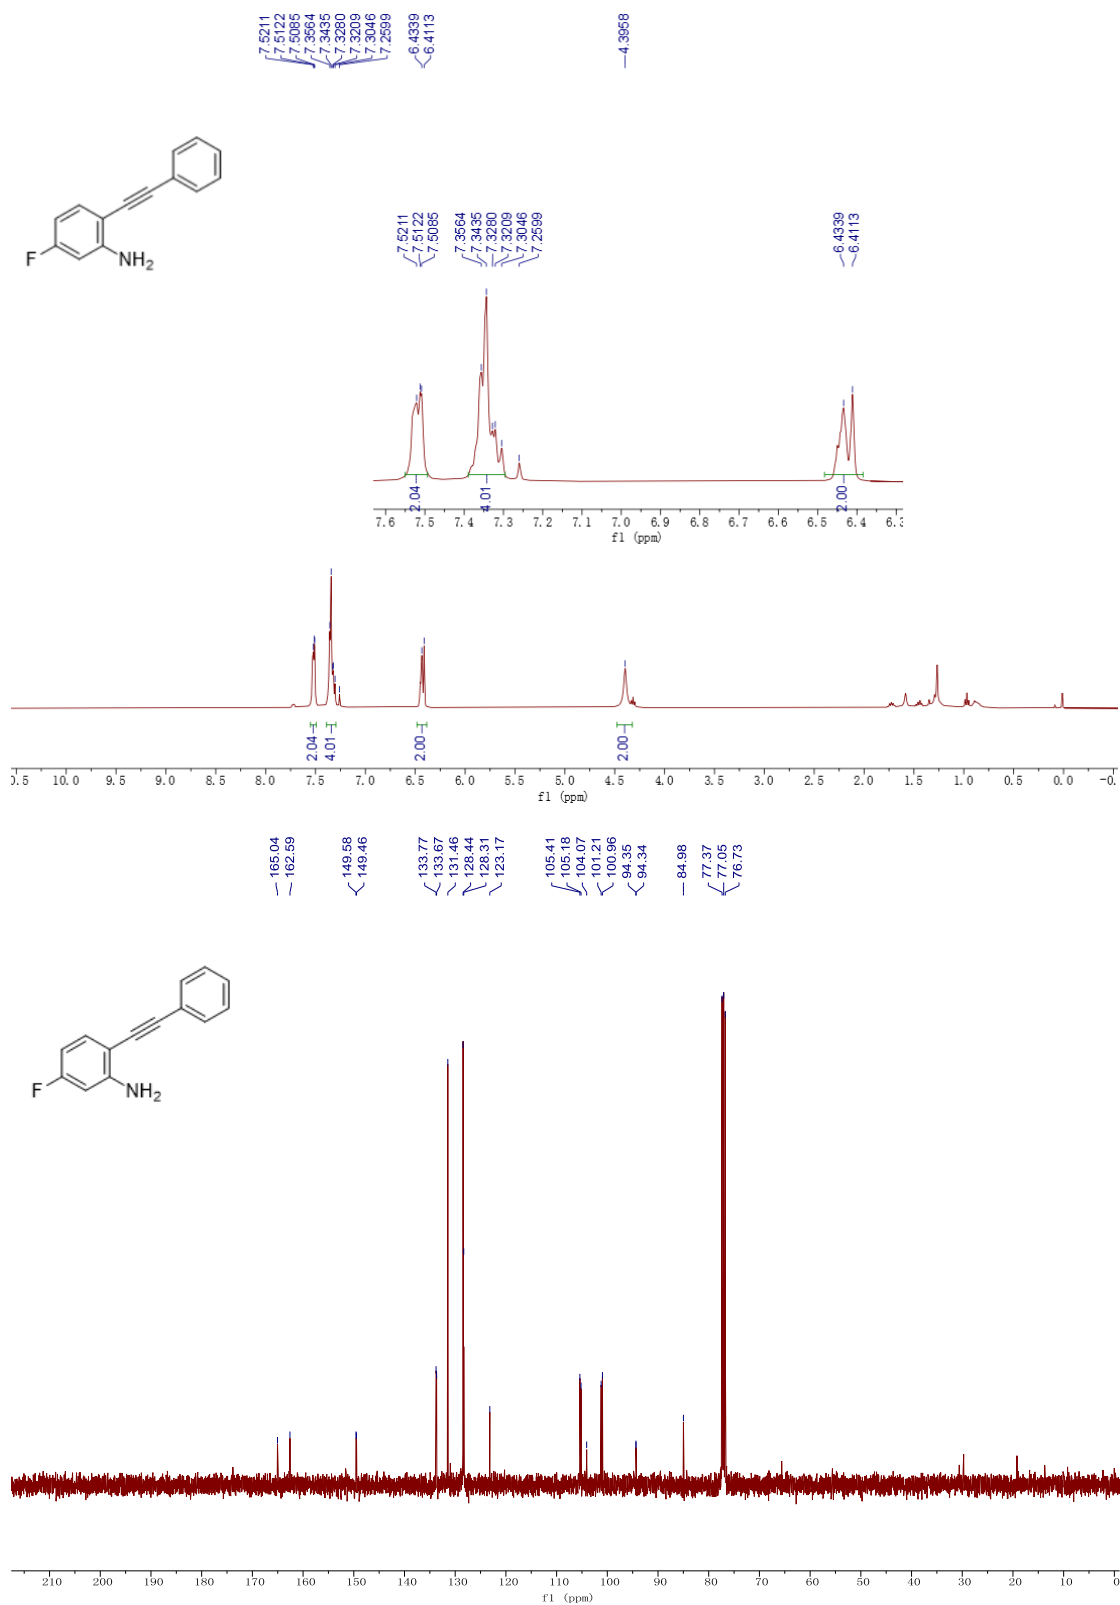

**Figure 5.**  $^1\text{H}$  NMR and  $^{13}\text{C}$  NMR Spectra of  
**5-Chloro-2-(phenylethynyl)aniline (2e)**

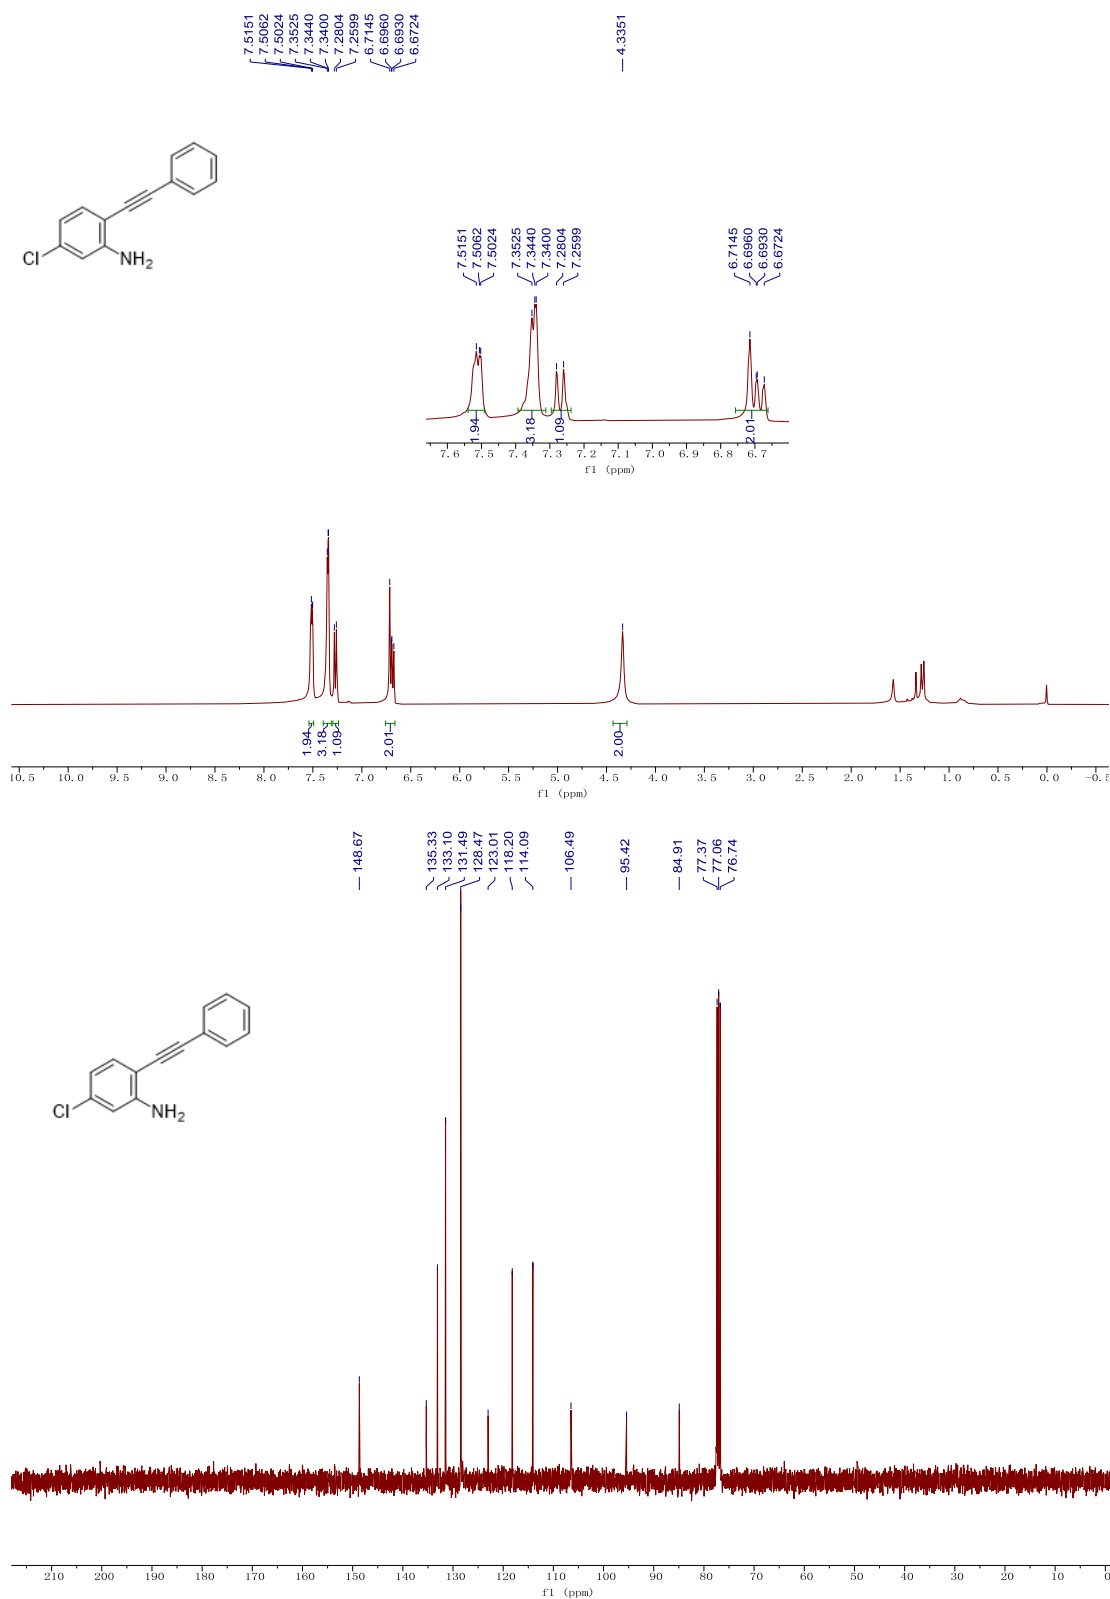



**Figure 6.**  $^1\text{H}$  NMR and  $^{13}\text{C}$  NMR Spectra of  
**2-(Phenylethynyl)-4-(trifluoromethyl)aniline (2f)**

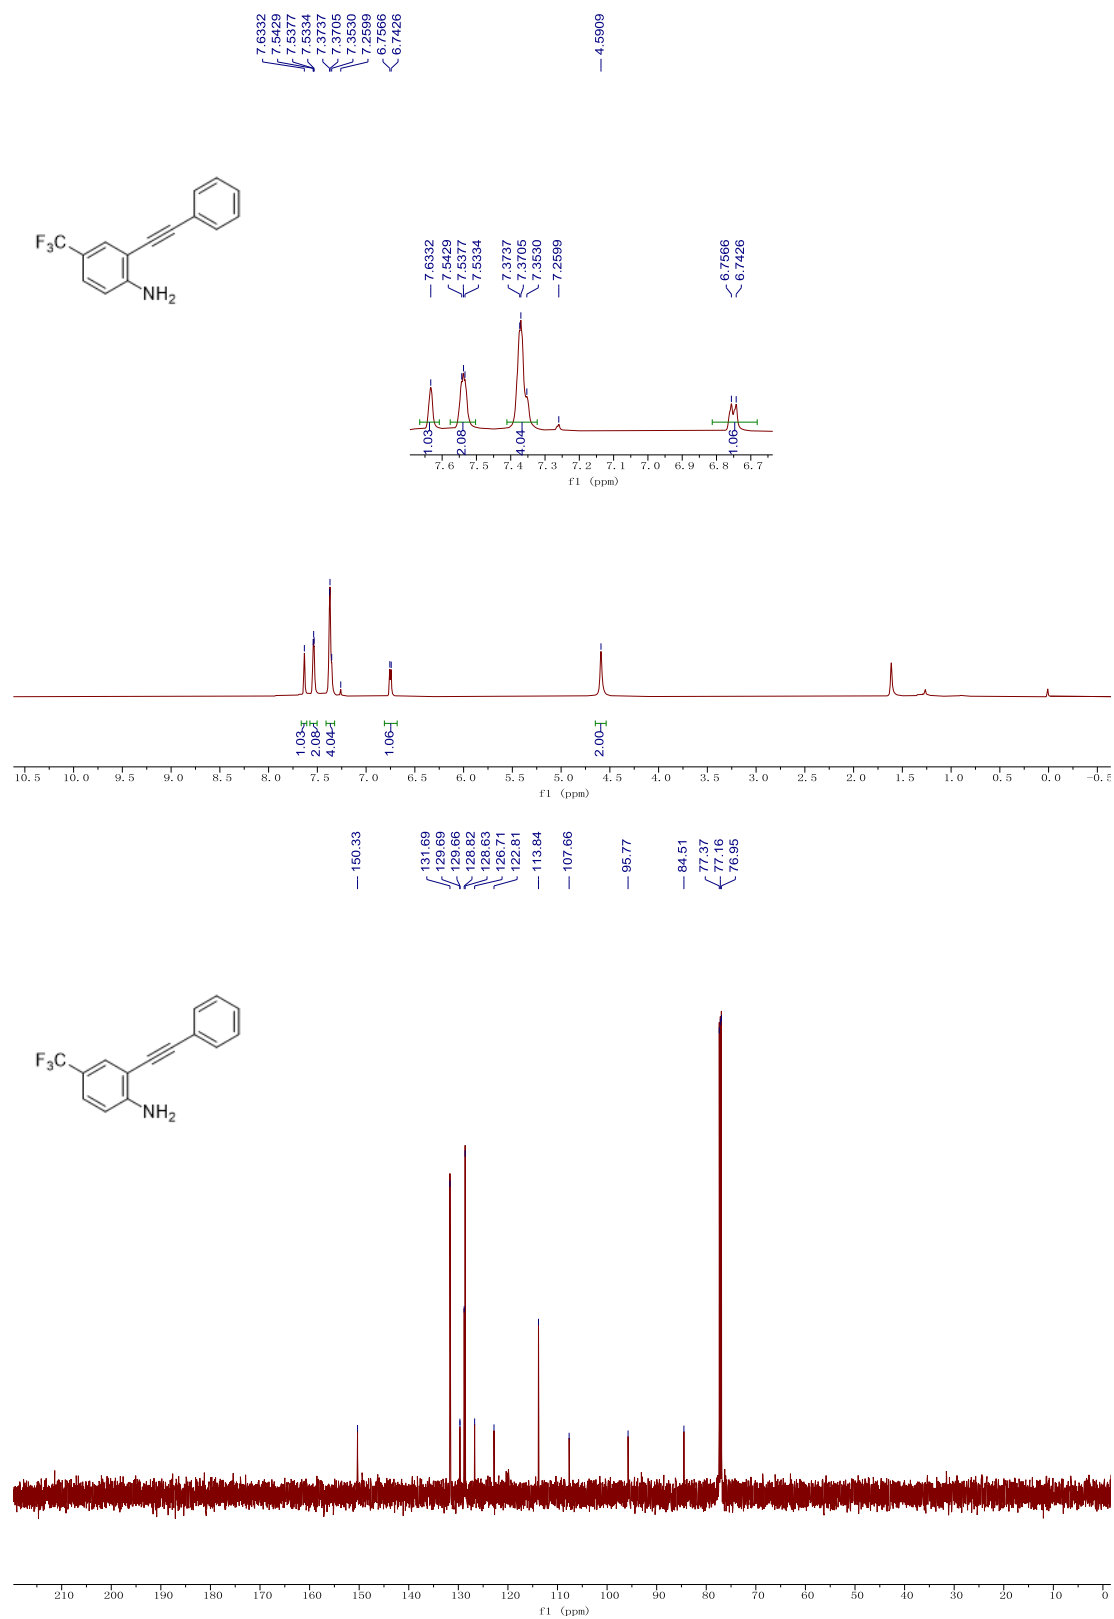

**Figure 7.**  $^1\text{H}$  NMR and  $^{13}\text{C}$  NMR Spectra of  
**Methyl 4-amino-3-(phenylethynyl)benzoate (2g)**

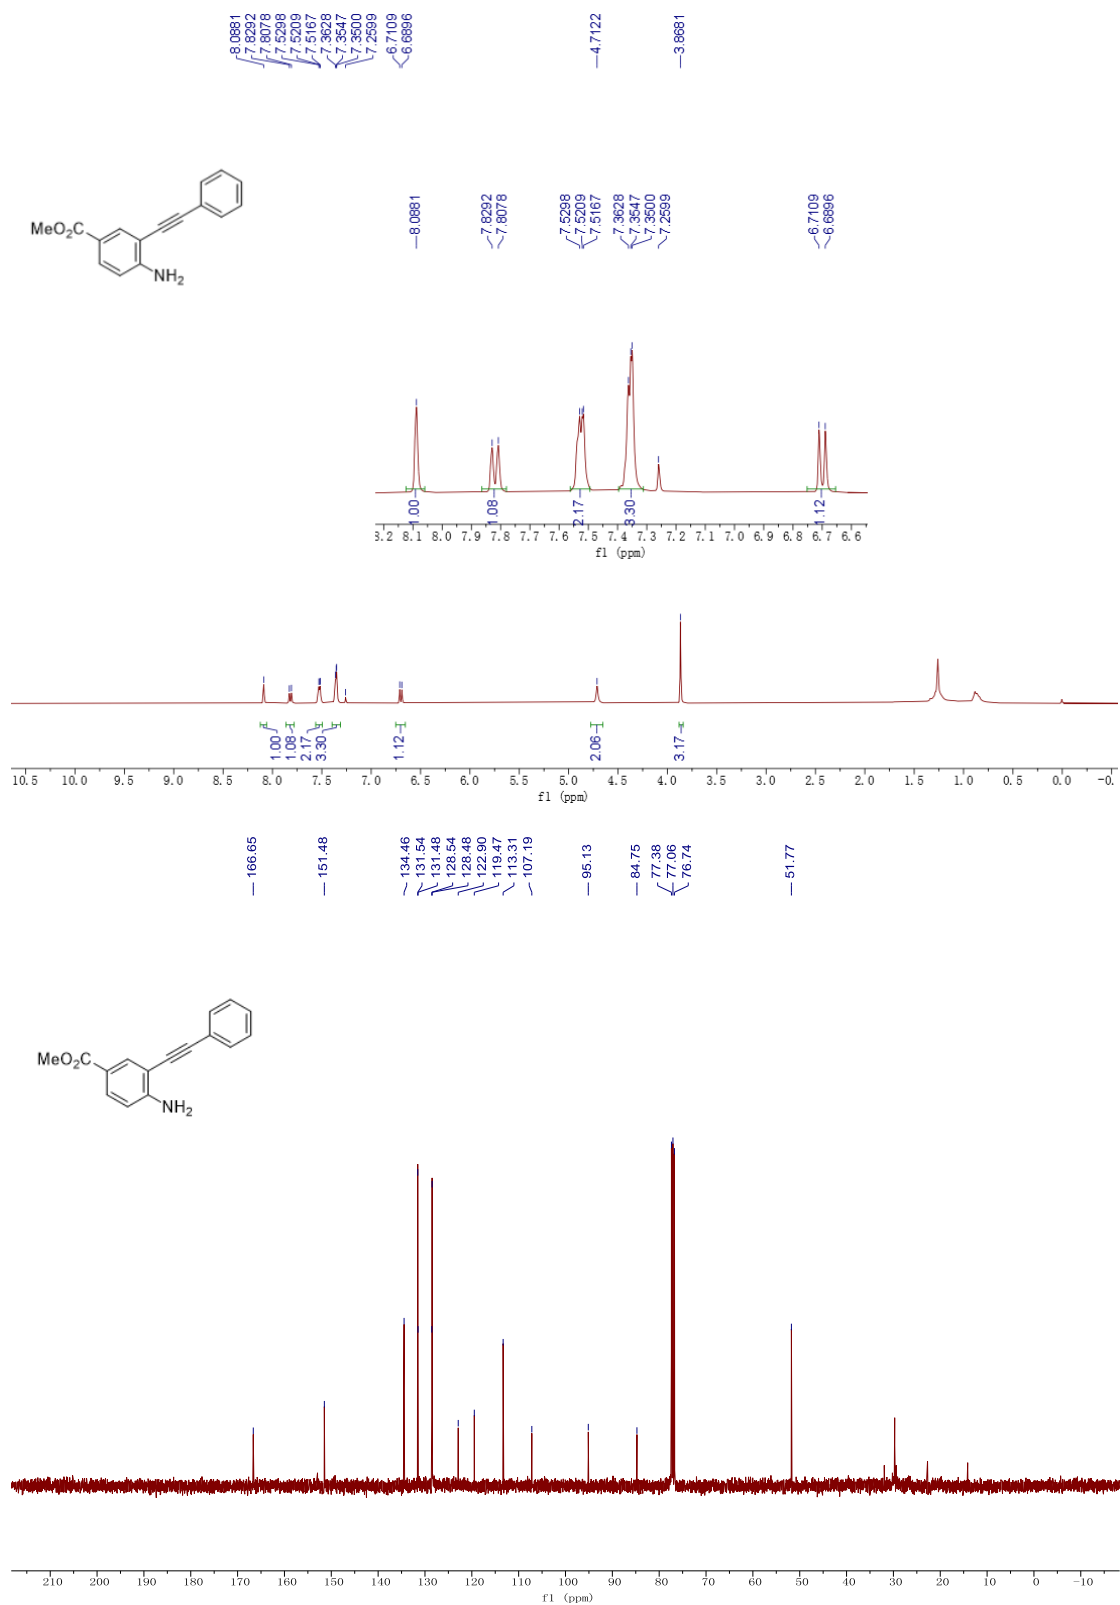

**Figure 8.**  $^1\text{H}$  NMR and  $^{13}\text{C}$  NMR Spectra of  
**Methyl 2-((4-ethylphenyl)ethynyl)aniline (2h)**

新建文件夹. 2022011701. 1. 1r  
xsj1h

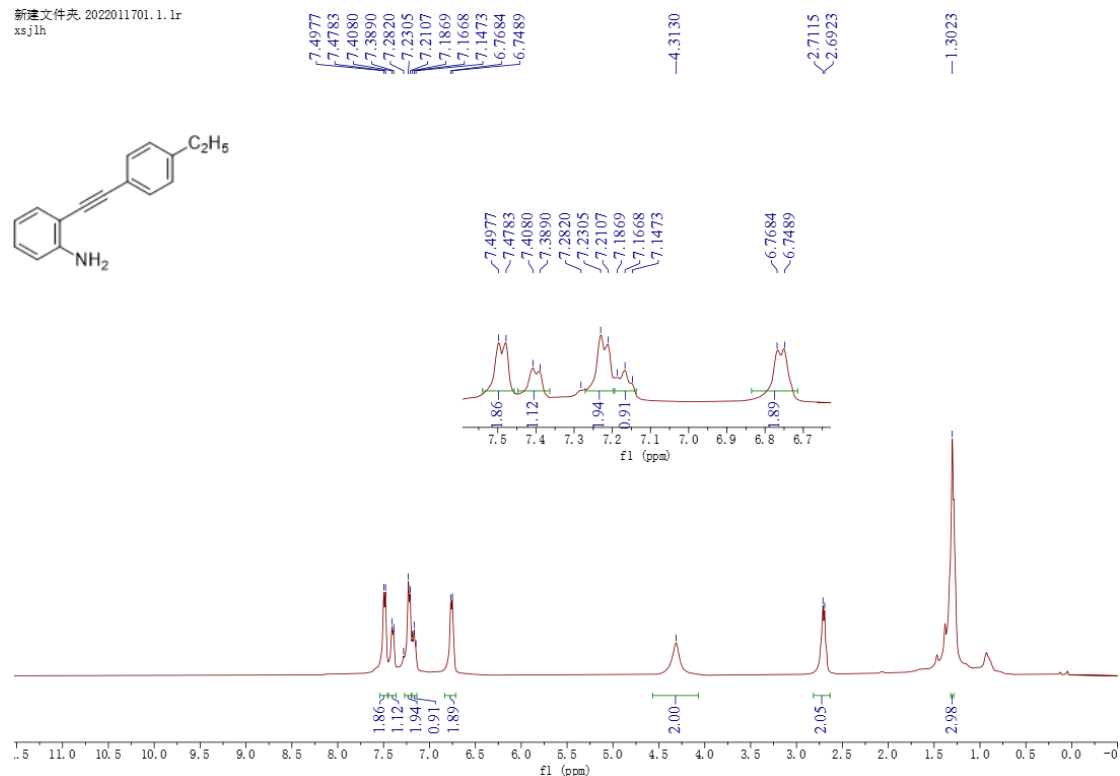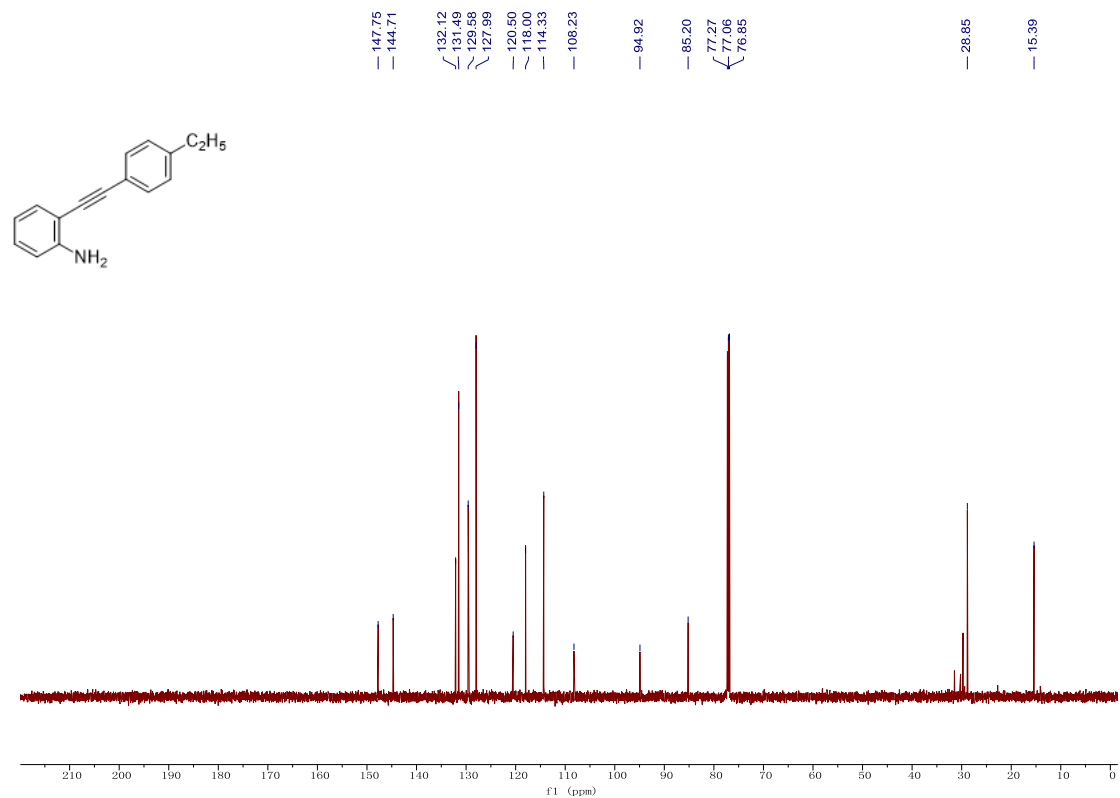

**Figure 9.**  $^1\text{H}$  NMR and  $^{13}\text{C}$  NMR Spectra of  
**Methyl 2-((4-pentylphenyl)ethynyl)aniline (2i)**

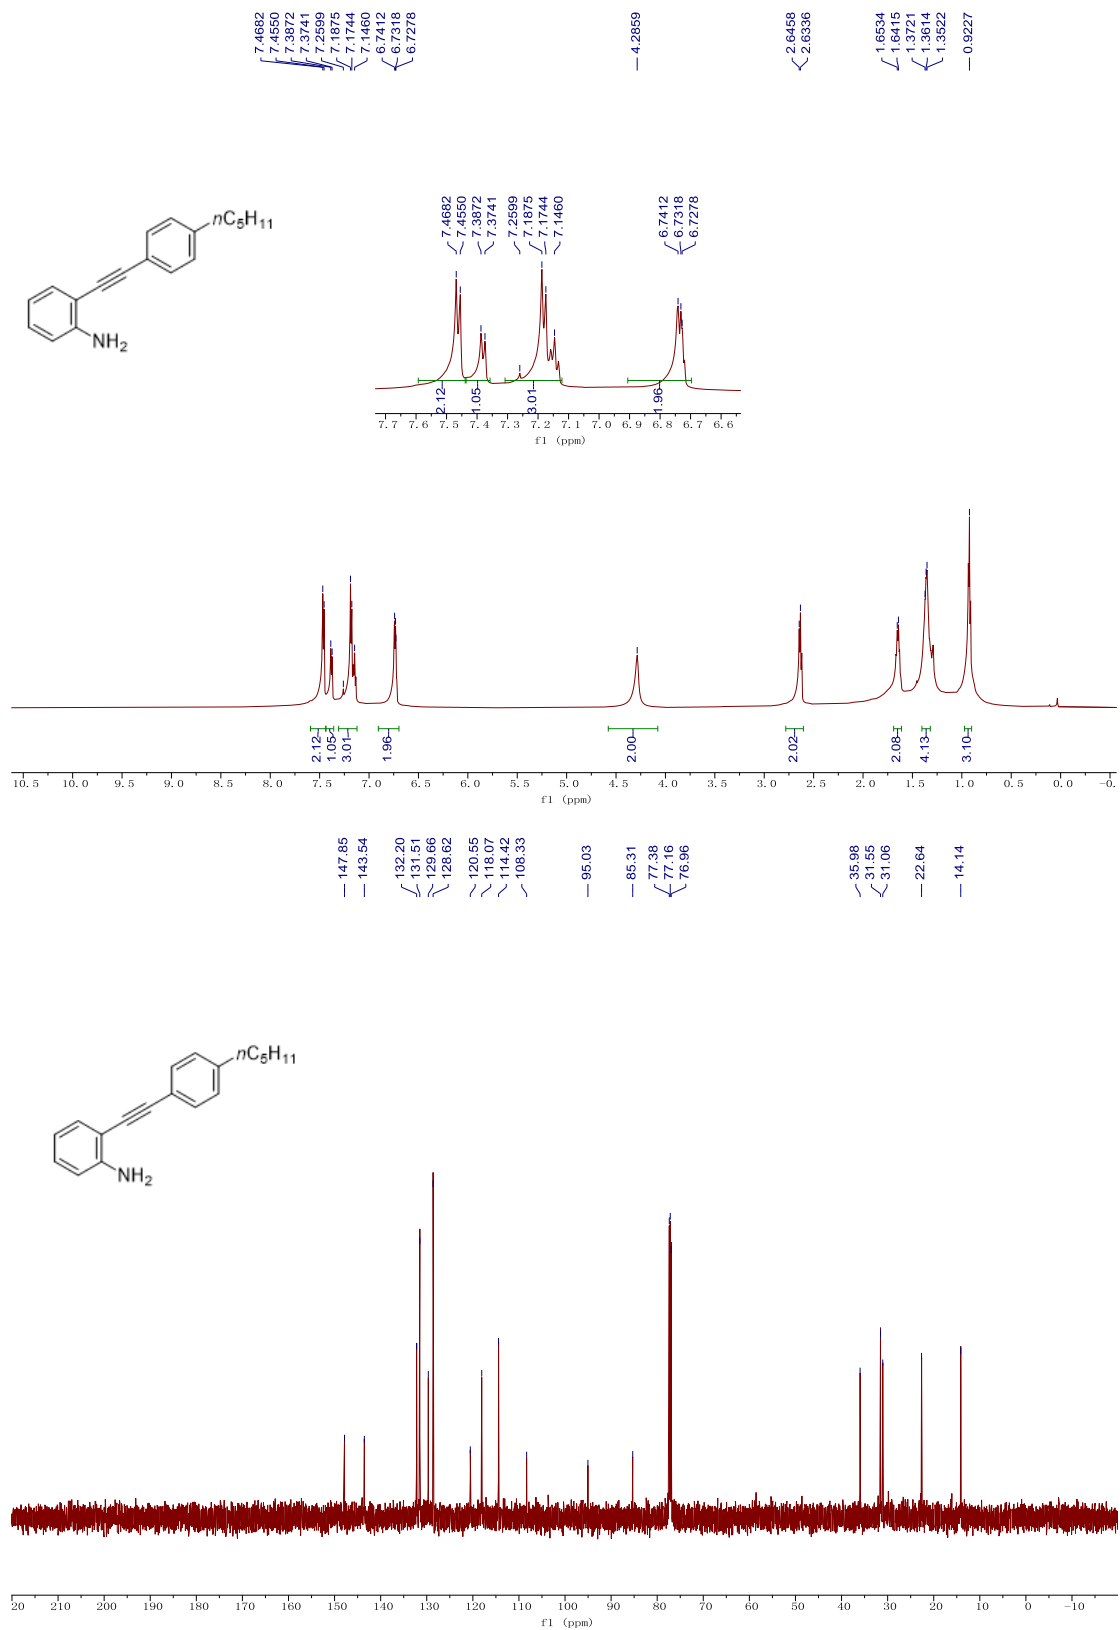

**Figure 10.**  $^1\text{H}$  NMR and  $^{13}\text{C}$  NMR Spectra of  
**Methyl 2-((4-chlorophenyl)ethynyl)aniline (2j)**

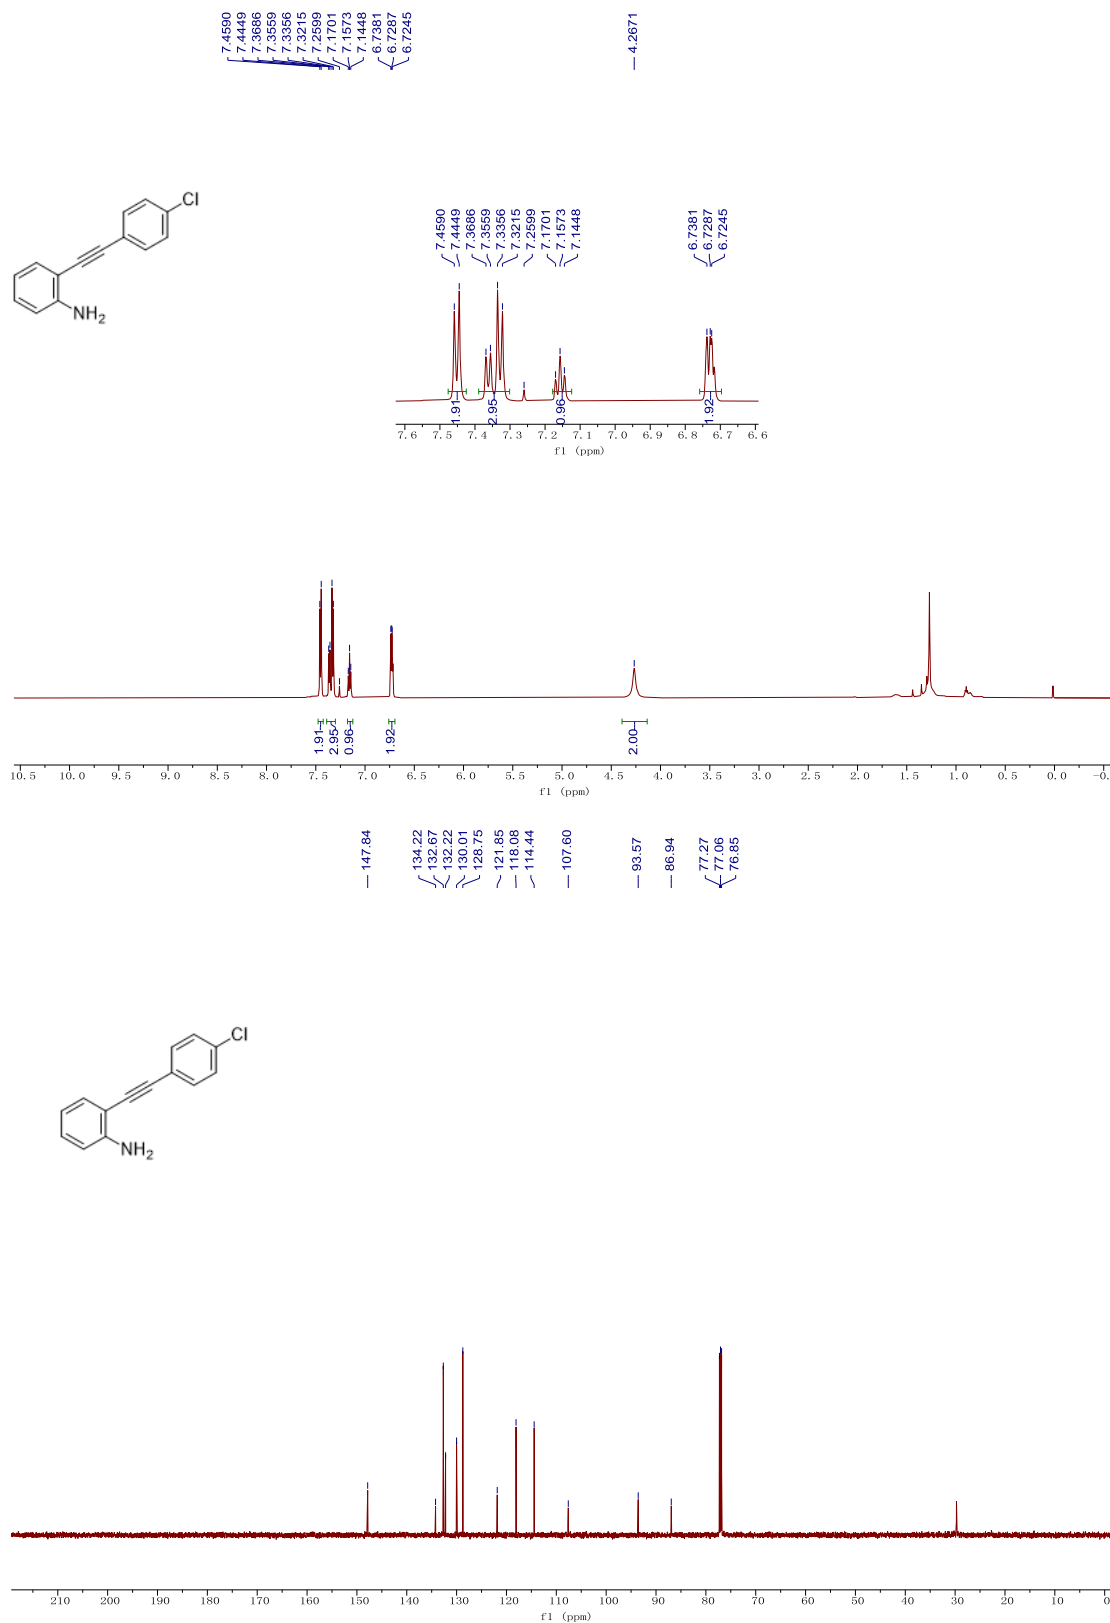

**Figure 11.**  $^1\text{H}$  NMR and  $^{13}\text{C}$  NMR Spectra of  
**Methyl 2-(Thiophen-2-ylethynyl)aniline (2k)**

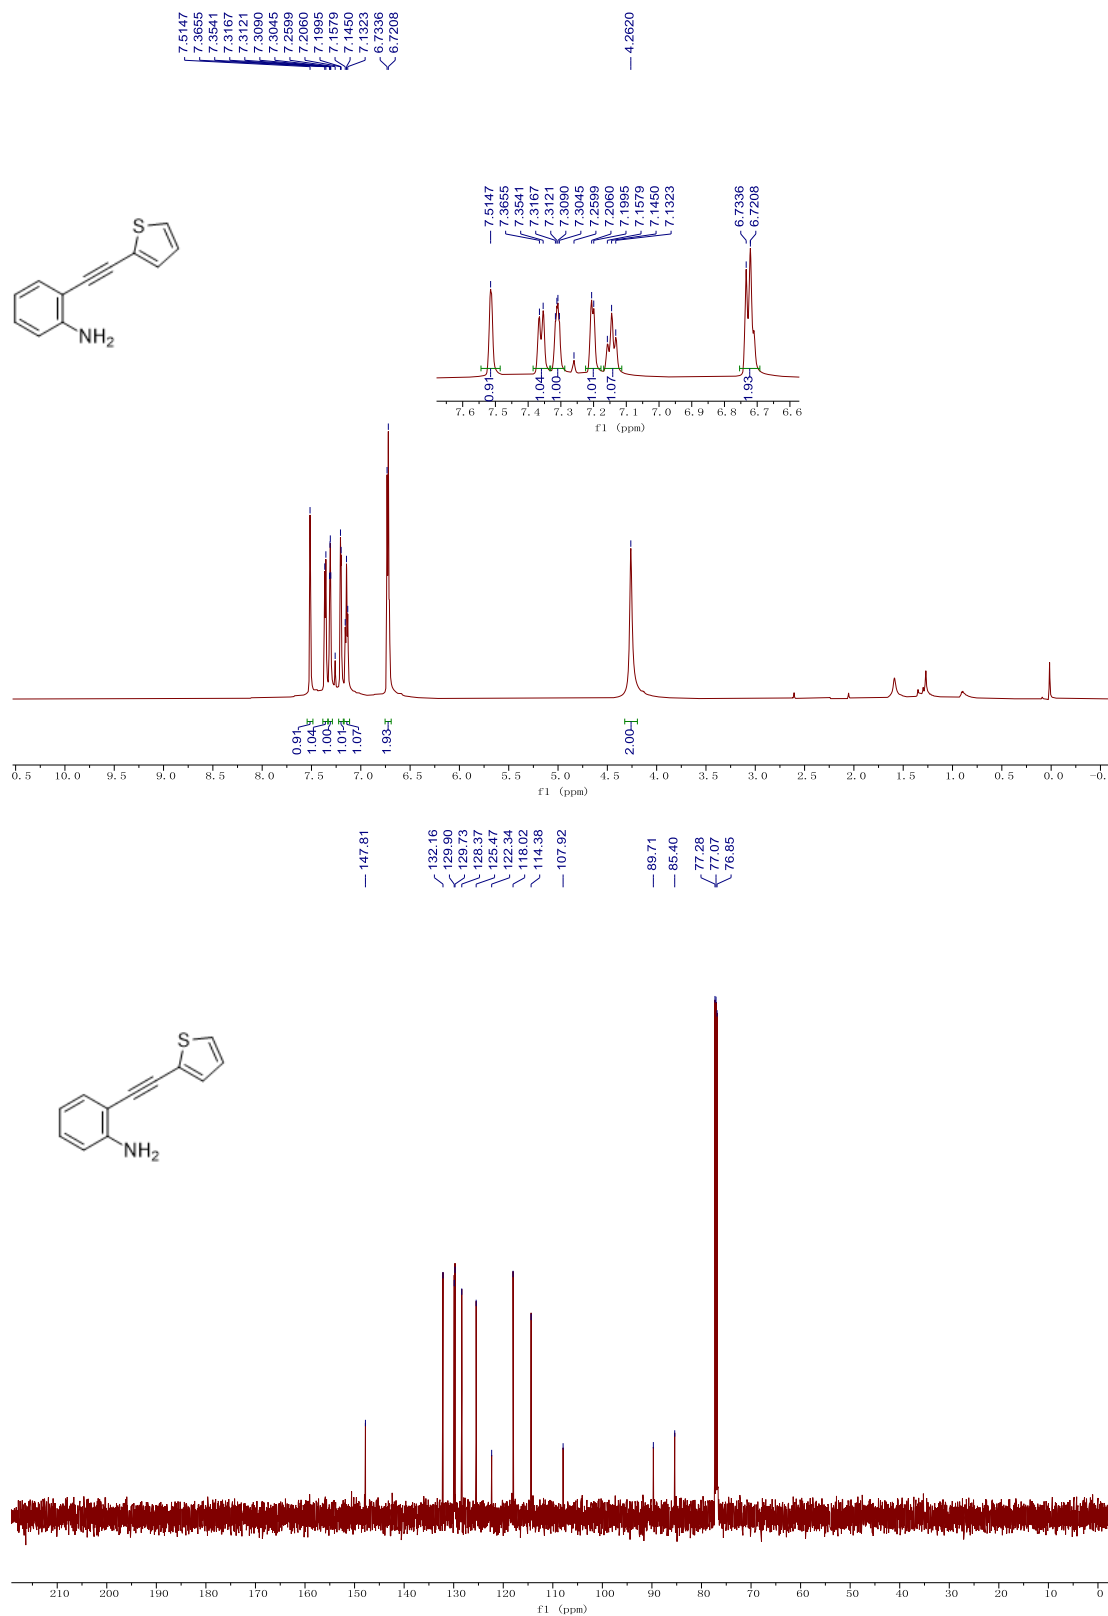

**Figure 12.**  $^1\text{H}$  NMR and  $^{13}\text{C}$  NMR Spectra of  
**Methyl 2-(cyclopropylethynyl)aniline (2I)**

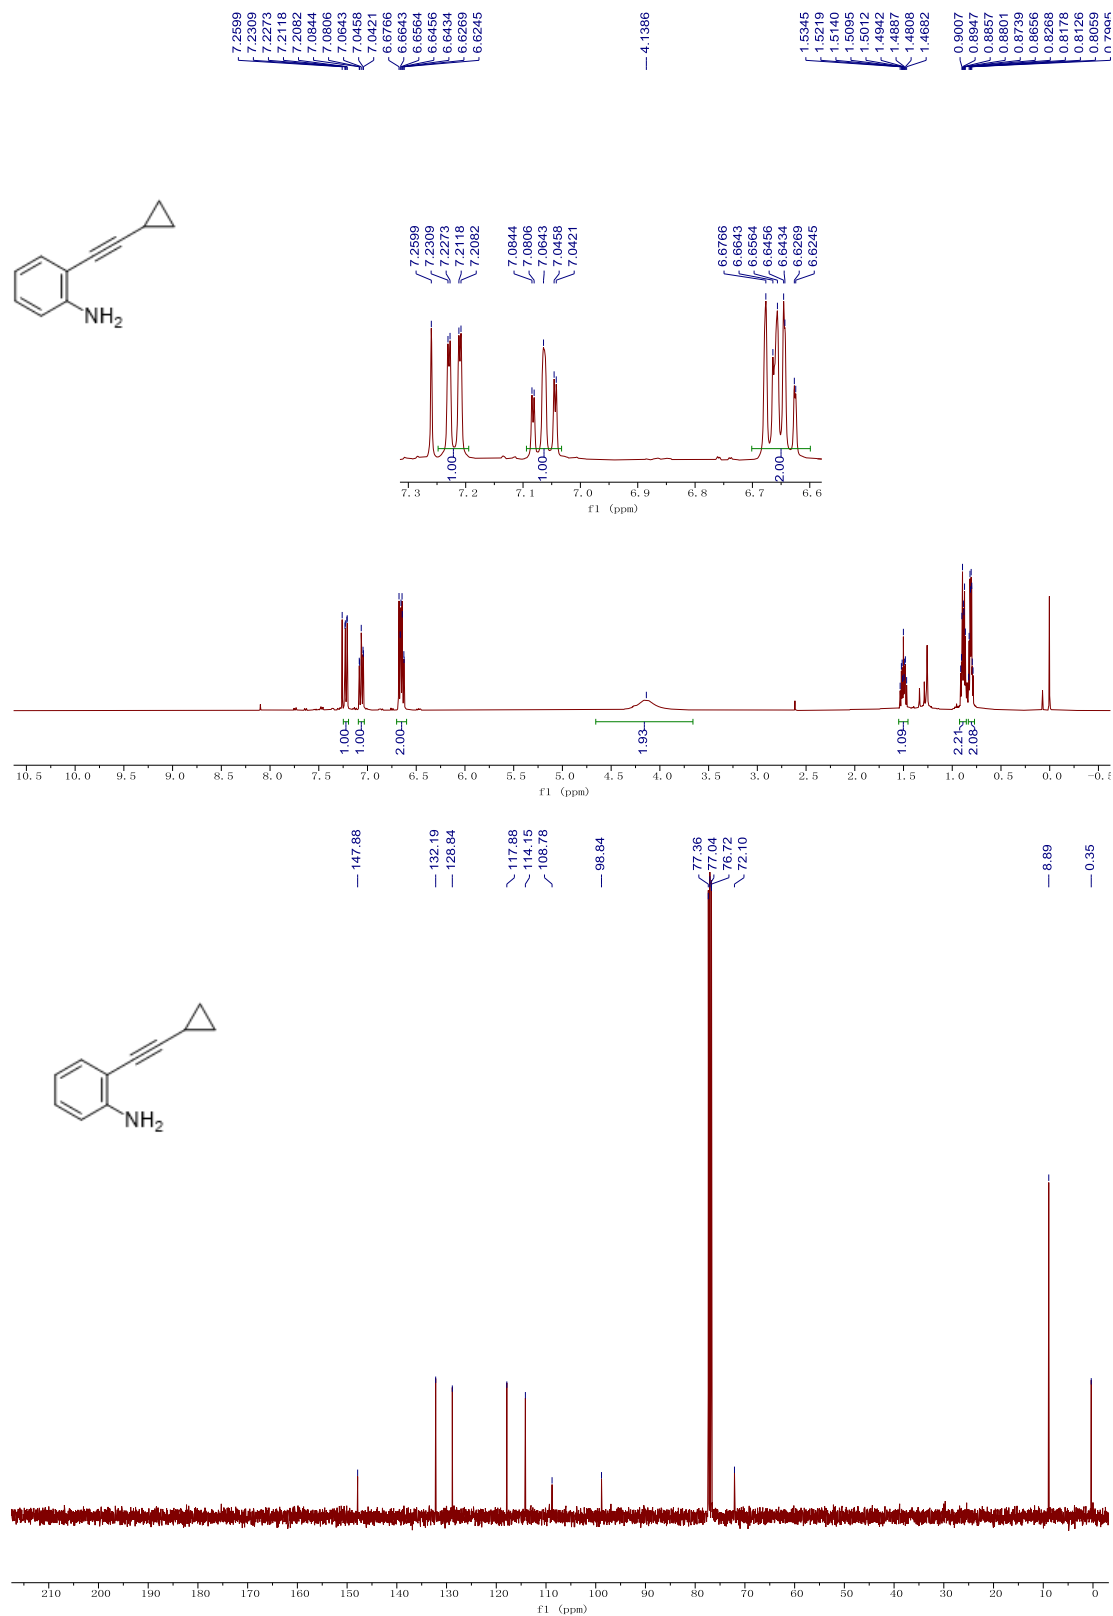

**Figure 13.**  $^1\text{H}$  NMR and  $^{13}\text{C}$  NMR Spectra of  
Methyl 2-(3,3-dimethyl-1-butynyl)aniline (2m)

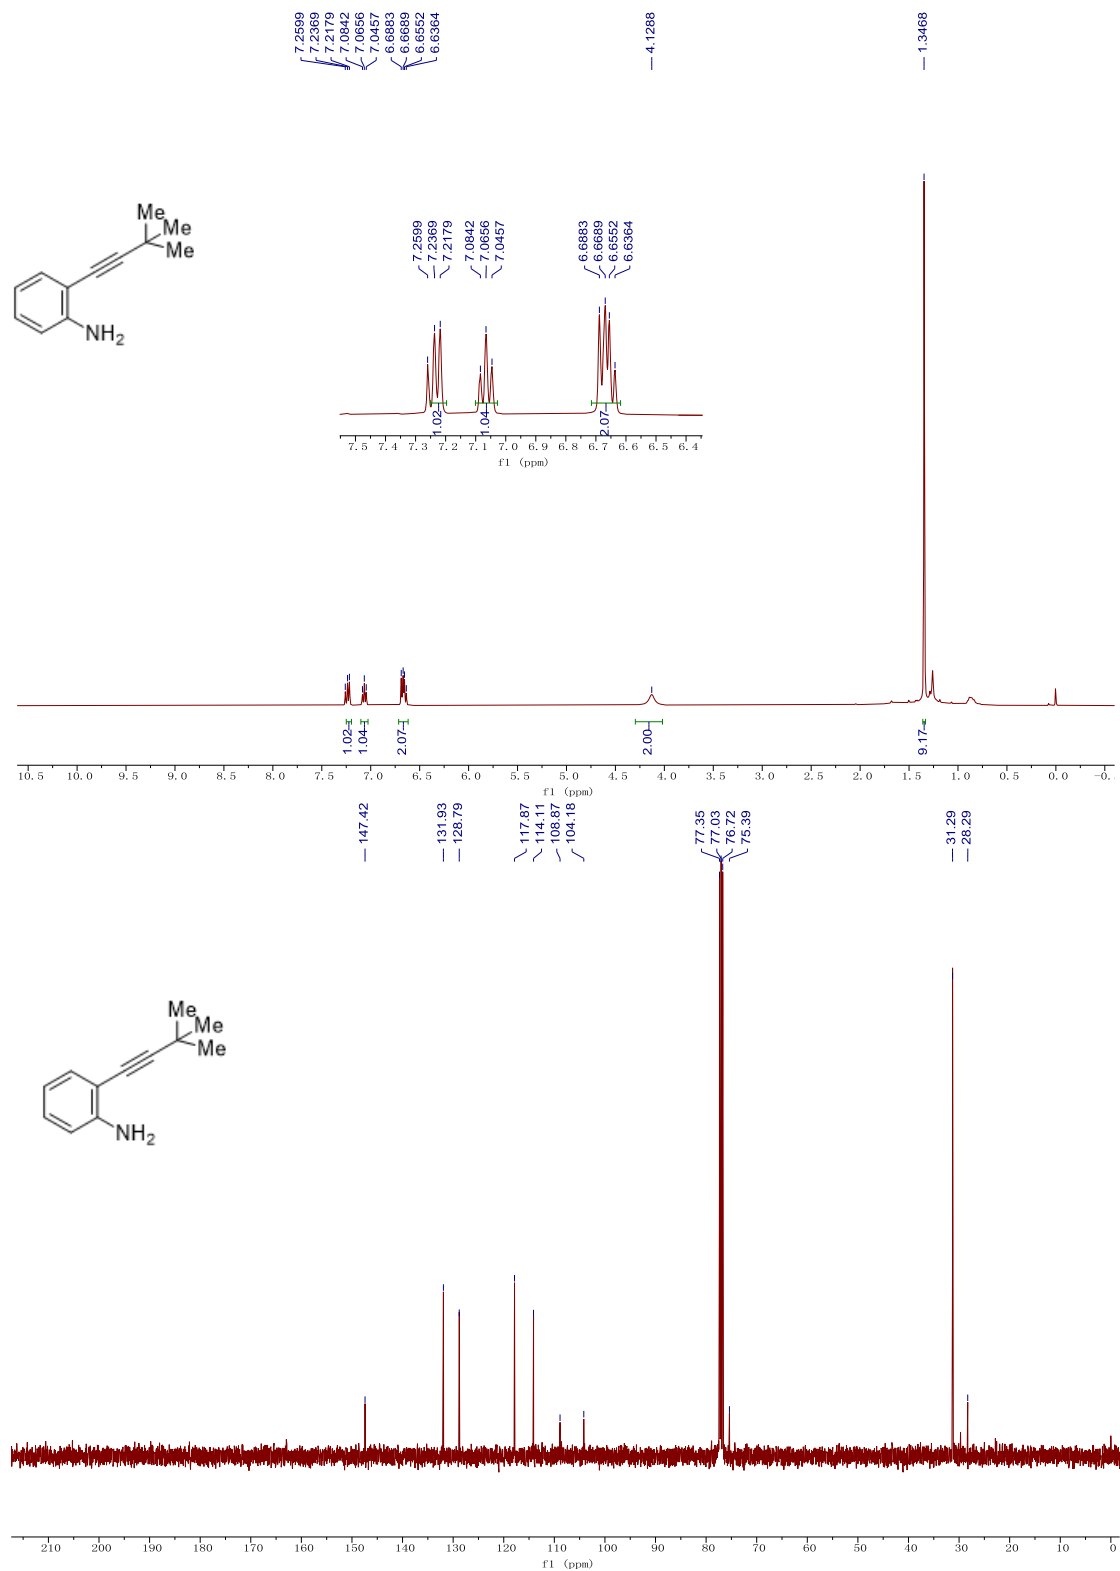



**Figure 14.**  $^1\text{H}$  NMR and  $^{13}\text{C}$  NMR Spectra of  
**Methyl 2-(2-(hydroxymethyl)ethynyl)aniline (2n)**

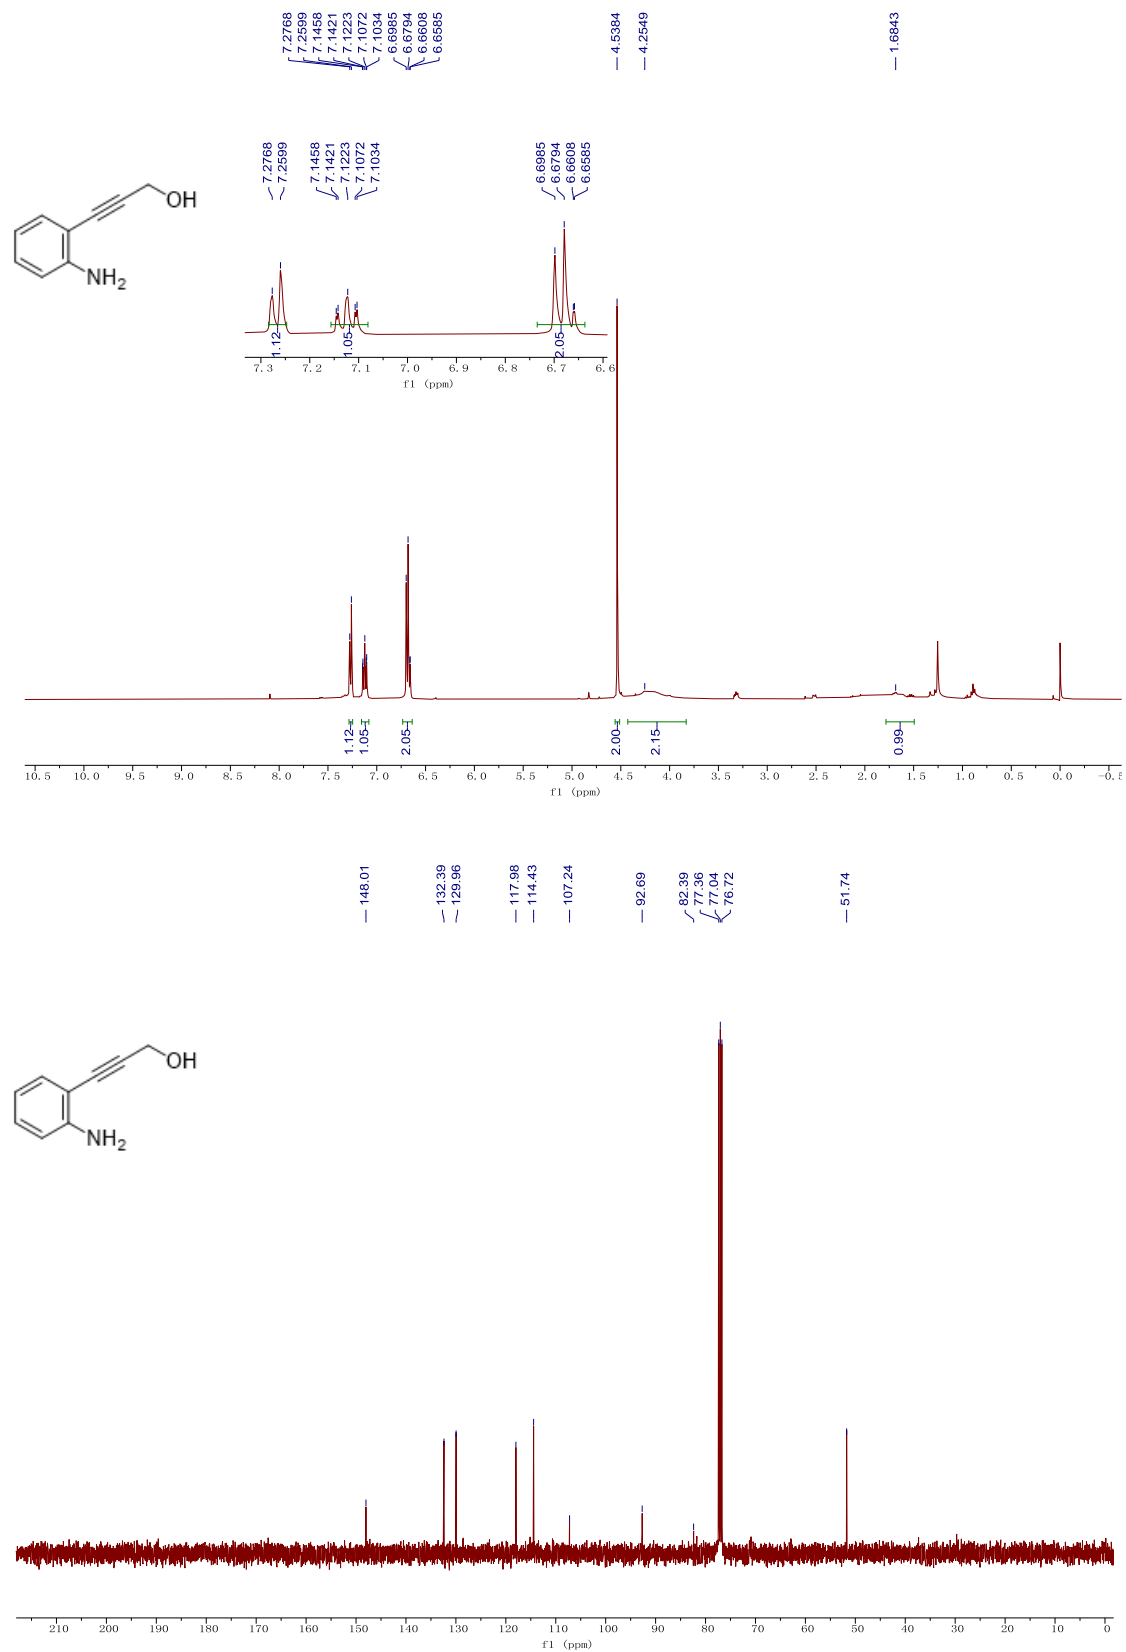

**Figure 15.**  $^1\text{H}$  NMR Spectra of  
**Methyl p-toluidine (2o)**

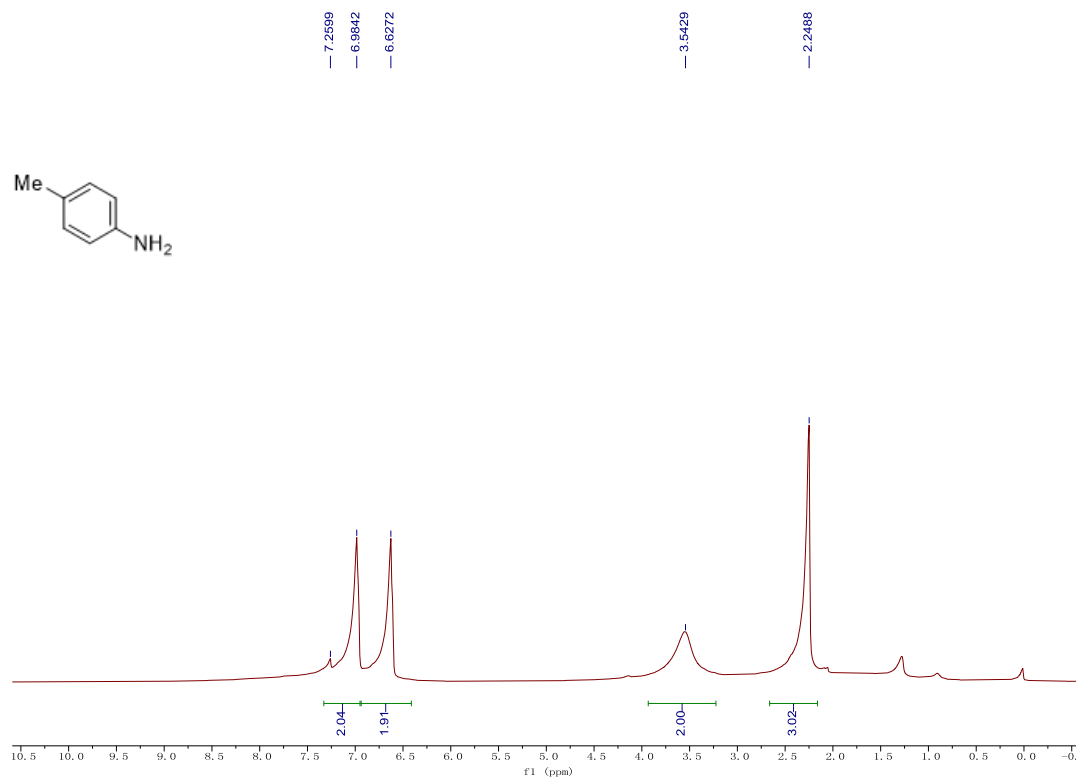

**Figure 16.**  $^1\text{H}$  NMR Spectra of  
**Methyl 4-(tert-butyl)aniline (2p)**

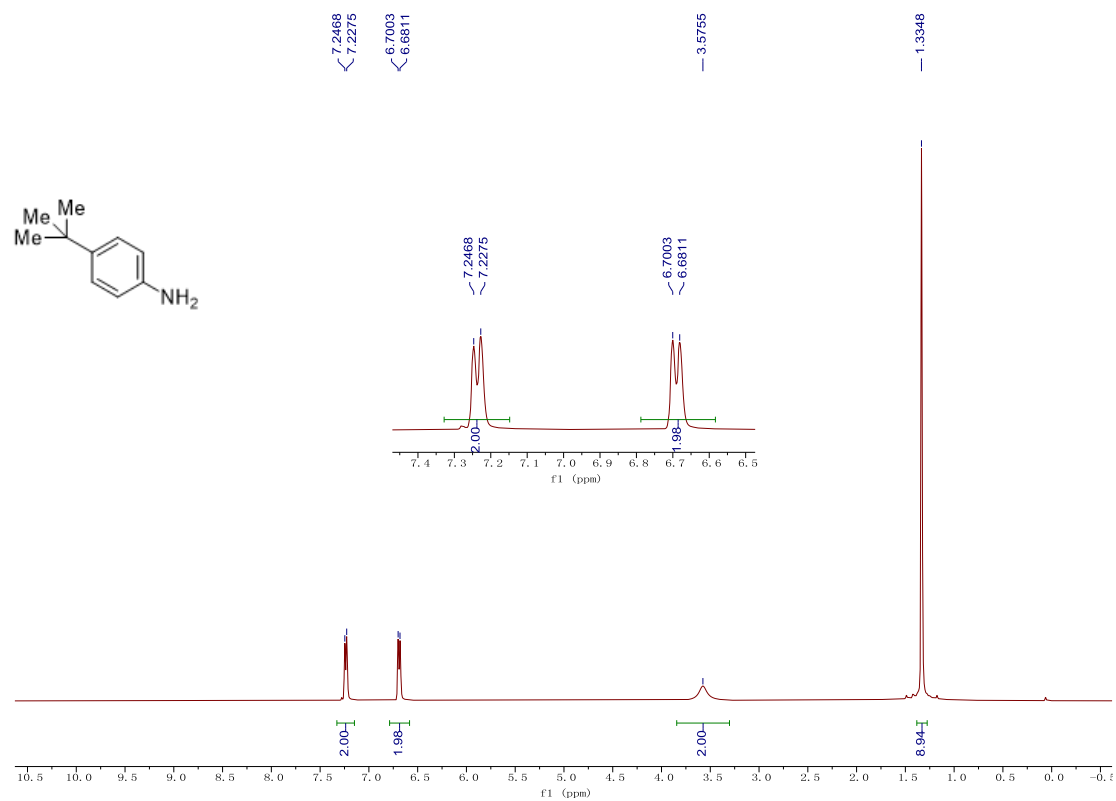

**Figure 17.**  $^1\text{H}$  NMR Spectra of  
**Methyl 4-methoxy-aniline (2q)**

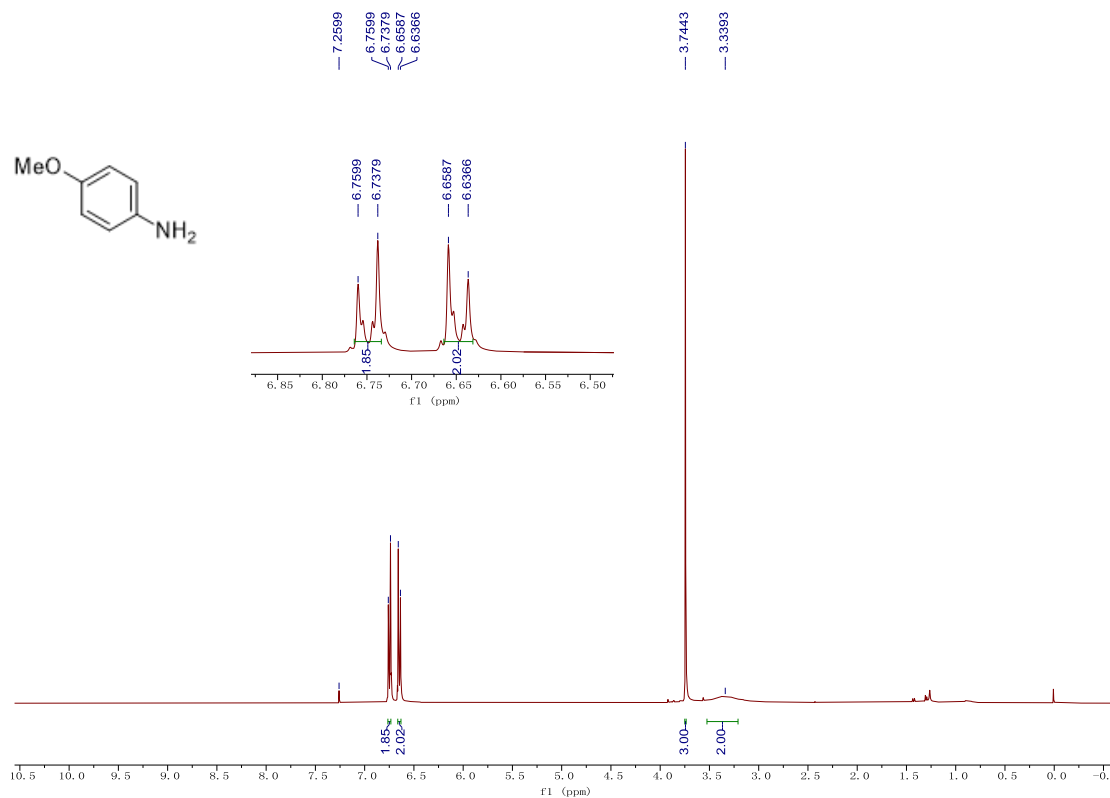

**Figure 18.**  $^1\text{H}$  NMR Spectra of  
**Methyl 1,4-phenylenediamine (2r)**

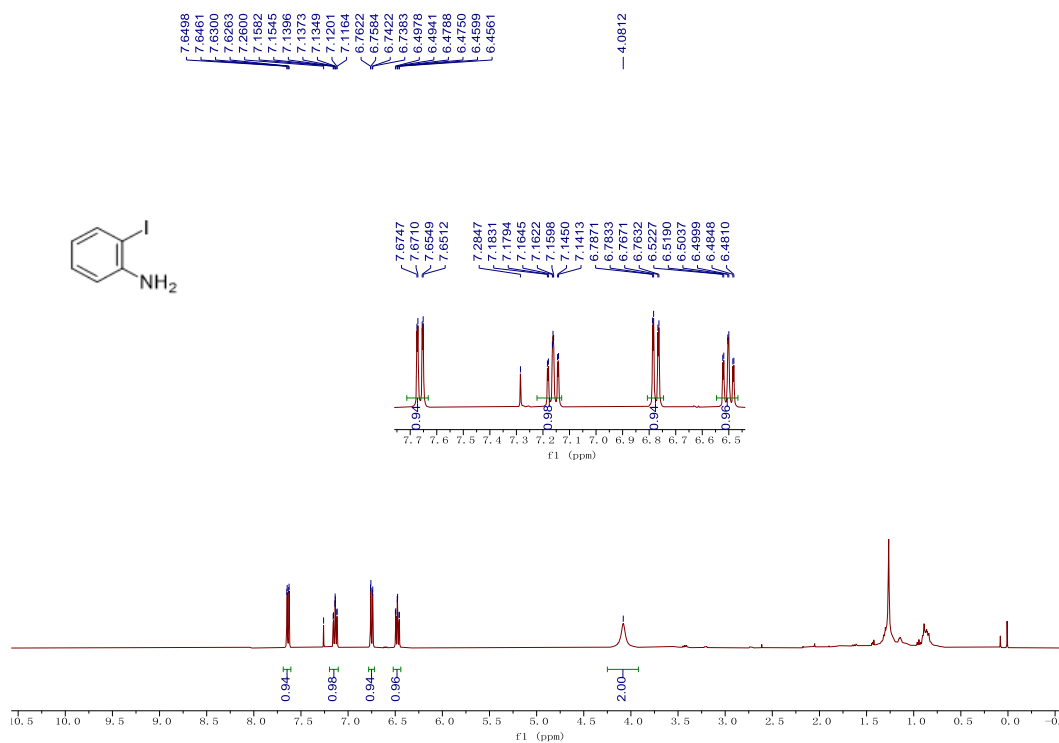

**Figure 19.**  $^1\text{H}$  NMR Spectra of  
**Methyl 4-Aminobenzonitrile (2s)**

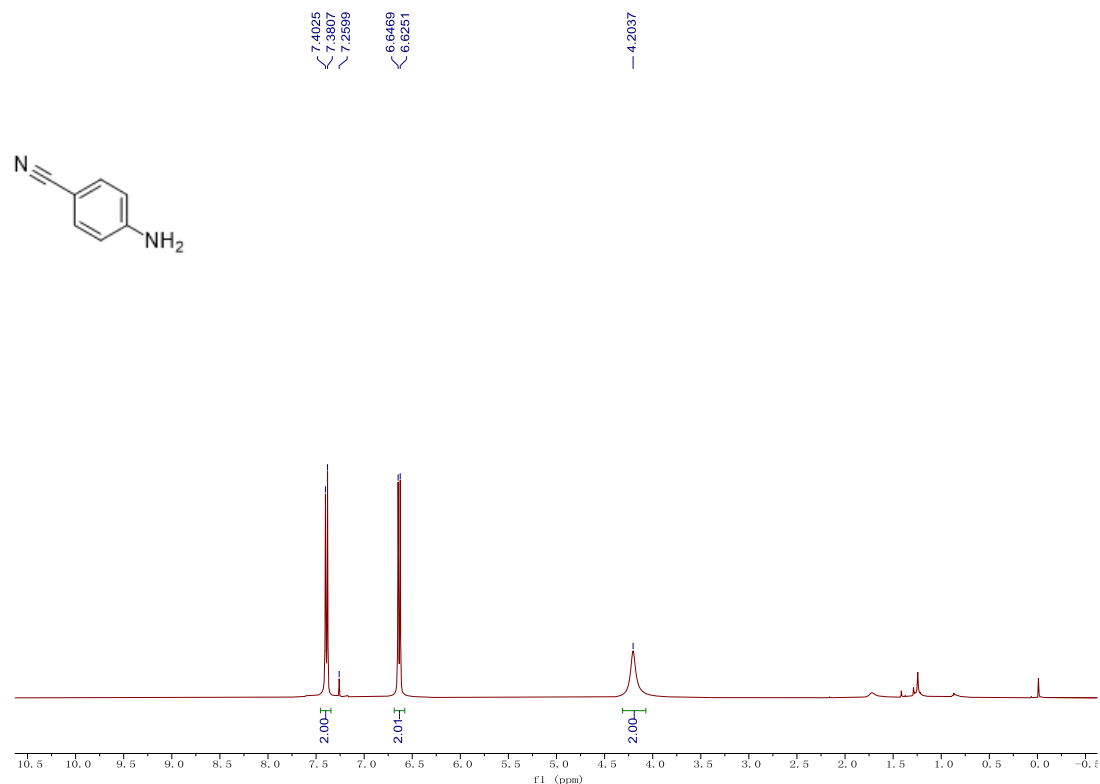

**Figure 20.**  $^1\text{H}$  NMR Spectra of  
**Methyl 4-Bromoaniline (2t)**

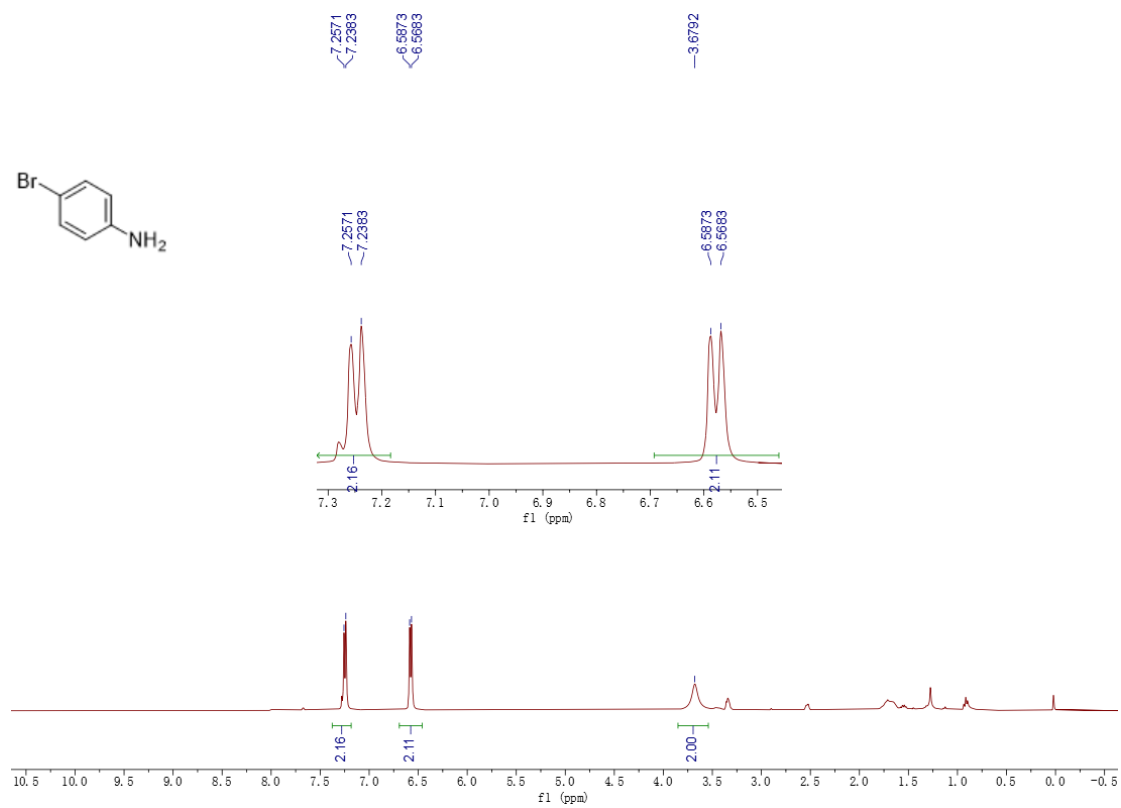

Chemical structure of 1-aminonaphthalene: Nc1cccc2ccccc12

<sup>1</sup>H NMR spectrum (DMSO-d<sub>6</sub>) of 1-aminonaphthalene. The spectrum shows peaks in the aromatic region (6.8–8.4 ppm) and a broad peak for the amino group protons (4.1 ppm). Integration values are provided for the aromatic signals.

| Chemical Shift (ppm)                                                                                                                                                                           | Integration |
|------------------------------------------------------------------------------------------------------------------------------------------------------------------------------------------------|-------------|
| 7.8430, 7.8363, 7.8303, 7.8241, 7.8171, 7.8120, 7.4978, 7.4863, 7.4846, 7.4810, 7.4741, 7.4659, 7.4626, 7.4605, 7.3524, 7.3353, 7.3260, 7.3183, 7.2983, 7.2599, 6.8053, 6.8013, 6.7882, 6.7842 | 2.11        |
| 7.4978, 7.4863, 7.4846, 7.4810, 7.4659, 7.4626, 7.4605, 7.3524, 7.3353, 7.3260, 7.3088, 7.2883, 7.2599, 6.8053, 6.8013, 6.7882, 6.7842                                                         | 2.18        |
| 7.4659, 7.4626, 7.4605, 7.3524, 7.3353, 7.3260, 7.3088, 7.2883, 7.2599, 6.8053, 6.8013, 6.7882, 6.7842                                                                                         | 2.07        |
| 7.3524, 7.3353, 7.3260, 7.3088, 7.2883, 7.2599, 6.8053, 6.8013, 6.7882, 6.7842                                                                                                                 | 2.00        |
| 4.1551                                                                                                                                                                                         | 0.99        |

Chemical structure: Cc1ccc(S(=O)(=O)N)cc1

<sup>1</sup>H NMR spectrum (DMSO-d<sub>6</sub>) showing peaks at the following chemical shifts (ppm): 7.8194, 7.7986, 7.3167, 7.2966, 7.2599, 4.9607, and 2.4276. Integration values are 1.98, 2.01, 2.00, and 3.00.

## References:

1. a) X. Zhang, X. Sun, H. Fan, C. Lyu, P. Li, H. Zhang and W. Rao, *RSC Adv.*, 2016, **6**, 56319-56322; b) X. Zhang, X. Sun, H. Fan, P. Li, C. Lyu and W. Rao, *Eur. J. Org. Chem.*, 2016, **25**, 4265-4268.
2. O. Berger, A. Kaniti, C. T. V. Ba, H. Vial, S. A. Ward, G. A. Biagini, P. G. Bray and P. M. O'Neill, *ChemMedChem.*, 2011, **6**, 2094–2108.
3. S. G. Alvarez and M. T. Alvarez, *Synthesis.*, 1997, **4**, 413–414.
4. B. Gabriele, L. Veltri, G. Salerno, R. Mancuso and M. Costa, *Adv. Synth. Catal.*, 2010, **352**, 3355-3363.
5. M. Alfonsi, A. Arcadi, M. Aschi, G. Bianchi and F. Marinelli, *J. Org. Chem.*, 2005, **70**, 2265-2273.
6. K. Sun, R. Sachwani, K. J. Richert and T. G. Driver, *Org. Lett.*, 2009, **11**, 3598-3601.
7. A. Wetzel and F. Gagosz, *Angew. Chem. Int. Ed.*, 2011, **50**, 7354 -7358.
8. G. Cantagrel, B. D. C. Carnavalet, C. Meyer and J. Cossy, *Org. Lett.*, 2009, **11**, 4262-4265.
9. B. Liu, H. Gao, Y. Yu, W. Wu and H. Jiang, *J. Org. Chem.*, 2013, **78**, 10319-10328.
10. S. Li, Z. Wang, H. Xiao, Z. Bian and J. Wang, *Chem. Commun.*, 2020, **56**, 7573-7576.
11. C. Peng, Y. Wang, L. Liu, H. Wang, J. Zhao and Q. Zhu, *Eur. J. Org. Chem.*, 2010, **5**, 818-822.
12. M. J. Islam, K. Matsuo, H. M. Menezes, M. Takahashi, H. Nakagawa, A. Kakugo, K. Sadac and N. Tamaoki, *Org. Biomol. Chem.*, 2019, **17**, 53-65.
13. S. Sharma, Yamini and P. Das, *New J. Chem.*, 2019, **43**, 1764-1769.
14. M. Fan, W. Zhou, Y. Jiang and D. Ma, *Org. Lett.*, 2015, **17**, 5934-5937.
15. L. F. Kuyper, D. P. Baccanari, M. L. Jones, R. N. Hunter, R. L. Tansik, S. S. Joyner, C. M. Boytos, S. K. Rudolph, V. Knick, H. R. Wilson, J. M. Caddell, H. S. Friedman, J. C. W. Comley and J. N. Stables, *J. Med. Chem.*, 1996, **39**, 892-903.
16. K. Suthagar and A. J. Fairbanks, *Chem. Commun.*, 2017, **53**, 713-715.
